# Supplementary material for: Boswellianols A–I, Structurally Diverse Diterpenoids from the Oleo-Gum Resin of Boswellia carterii and Their TGF-β Inhibition Activity
Source: MDPI journal article supplement (doi:10.3390/plants13081074), 2024-04-11
Supplement: s1 [file s1]

## Supplementary Materials

# Boswellianols A–I, Structurally Diverse Diterpenoids from the Oleo-gum Resin of *Boswellia carterii* and Their TGF- $\beta$ Inhibition Activity

Zhi-Rong Lin <sup>1</sup>, Meng-Yu Bao <sup>1</sup>, Hao-Ming Xiong <sup>1</sup>, Dai Cao <sup>1</sup>, Li-Ping Bai <sup>1</sup>, Wei Zhang <sup>1</sup>,  
Cheng-Yu Chen <sup>2</sup>, Zhi-Hong Jiang <sup>1\*</sup>, and Guo-Yuan Zhu <sup>1\*</sup>

<sup>1</sup> State Key Laboratory of Quality Research in Chinese Medicines, Guangdong-Hong Kong-Macao Joint Laboratory of Respiratory Infectious Disease, Macau Institute for Applied Research in Medicine and Health, Macau University of Science and Technology, Macau 999078, China; thomas05@sina.cn (Z.-R.L.); 3220004965@student.must.edu.mo (M.-Y.B.); 3230006692@student.must.edu.mo (H.-M.X.); caodai8989@163.com (D.C.); lpbai@must.edu.mo (L.-P.B.); wzhang@must.edu.mo (W. Z.)

<sup>2</sup> Jiaheng Pharmaceutical Technology Co., Ltd., Zhuhai 519000, China; yanfachenchengyu@fusenpharma.com

\* Correspondence: zhjiang@must.edu.mo (Z.-H. Jiang), gyzhu@must.edu.mo (G.-Y. Zhu).

## The List of Contents

|            |                                                                     |    |
|------------|---------------------------------------------------------------------|----|
| FigureS1.  | HRESIMS spectrum of compound 1.....                                 | 1  |
| FigureS2.  | <sup>1</sup> H NMR spectrum of compound 1.....                      | 1  |
| FigureS3.  | <sup>13</sup> C-NMR spectrum of compound 1 .....                    | 2  |
| FigureS4.  | HSQC NMR spectrum of compound 1 .....                               | 2  |
| FigureS5.  | HMQC NMR spectrum of compound 1 .....                               | 3  |
| FigureS6.  | <sup>1</sup> H- <sup>1</sup> H COSY spectrum of compound 1.....     | 3  |
| FigureS7.  | NOESY spectrum of compound 1.....                                   | 4  |
| FigureS8.  | The UV spectrum of compound 1 .....                                 | 4  |
| FigureS9.  | The IR spectrum of compound 1.....                                  | 5  |
| FigureS10. | The ECD spectrum of compound 1.....                                 | 5  |
| FigureS11. | HRESIMS spectrum of compound 2.....                                 | 6  |
| FigureS12. | <sup>1</sup> H NMR spectrum of compound 2.....                      | 6  |
| FigureS13. | <sup>13</sup> C NMR spectrum of compound 2.....                     | 7  |
| FigureS14. | HSQC NMR spectrum of compound 2 .....                               | 7  |
| FigureS15. | HMQC NMR spectrum of compound 2.....                                | 8  |
| FigureS16. | <sup>1</sup> H- <sup>1</sup> H COSY spectrum of compound 2.....     | 8  |
| FigureS17. | NOESY NMR spectrum of compound 2.....                               | 9  |
| FigureS18. | UV spectrum of compound 2. ....                                     | 9  |
| FigureS19. | IR spectrum of compound 2. ....                                     | 10 |
| FigureS20. | ECD spectrum of compound 2. ....                                    | 10 |
| FigureS21. | HRESIMS spectrum of compound 3.....                                 | 11 |
| FigureS22. | <sup>1</sup> H NMR spectrum of compound 3.....                      | 11 |
| FigureS23. | <sup>13</sup> C NMR spectrum of compound 3.....                     | 12 |
| FigureS24. | HSQC NMR spectrum of compound 3 .....                               | 12 |
| FigureS25. | HMBC NMR spectrum of compound 3 .....                               | 13 |
| FigureS26. | <sup>1</sup> H- <sup>1</sup> H COSY NMR spectrum of compound 3..... | 13 |
| FigureS27. | NOESY NMR spectrum of compound 3.....                               | 14 |
| FigureS28. | UV spectrum of compound 3 .....                                     | 14 |
| FigureS29. | IR spectrum of compound 3.....                                      | 15 |
| FigureS30. | ECD spectrum of compound 3 .....                                    | 15 |
| FigureS31. | HRESIMS spectrum of compound 4.....                                 | 16 |
| FigureS32. | <sup>1</sup> H NMR spectrum of compound 4.....                      | 16 |
| FigureS33. | <sup>13</sup> C-NMR spectrum of Compound 4 .....                    | 17 |
| FigureS34. | HSQC NMR spectrum of compound 4 .....                               | 17 |
| FigureS35. | HMBC NMR spectrum of compound 4 .....                               | 18 |
| FigureS36. | <sup>1</sup> H- <sup>1</sup> H COSY NMR spectrum of compound 4..... | 18 |
| FigureS37. | NOESY NMR spectrum of compound 4.....                               | 19 |
| FigureS38. | UV spectrum of compound 4 .....                                     | 19 |
| FigureS39. | ECD spectrum of compound 4.....                                     | 20 |
| FigureS40. | HRESIMS spectrum of compound 5.....                                 | 21 |
| FigureS41. | <sup>1</sup> H NMR spectrum of compound 5.....                      | 21 |

|            |                                                                  |    |
|------------|------------------------------------------------------------------|----|
| FigureS42. | $^{13}\text{C}$ NMR spectrum of compound 5.....                  | 22 |
| FigureS43. | HSQC NMR spectrum of compound 5 .....                            | 22 |
| FigureS44. | HMBC NMR spectrum of compound 5 .....                            | 23 |
| FigureS45. | $^1\text{H}$ - $^1\text{H}$ COSY NMR spectrum of compound 5..... | 23 |
| FigureS46. | NOESY NMR spectrum of compound 5.....                            | 24 |
| FigureS47. | UV spectrum of compound 5 .....                                  | 24 |
| FigureS48. | IR spectrum of compound 5.....                                   | 25 |
| FigureS49. | ECD spectrum of compound 5 .....                                 | 25 |
| FigureS50. | HRESIMS spectrum of compound 6.....                              | 26 |
| FigureS51. | $^1\text{H}$ NMR spectrum of compound 6.....                     | 26 |
| FigureS52. | $^{13}\text{C}$ NMR spectrum of compound 6.....                  | 27 |
| FigureS53. | HSQC NMR spectrum of compound 6 .....                            | 27 |
| FigureS54. | HMBC NMR spectrum of compound 6 .....                            | 28 |
| FigureS55. | $^1\text{H}$ - $^1\text{H}$ COSY NMR spectrum of compound 6..... | 28 |
| FigureS56. | NOESY NMR spectrum of compound 6.....                            | 29 |
| FigureS57. | UV spectrum of compound 6 .....                                  | 29 |
| FigureS58. | IR spectrum of compound 6.....                                   | 30 |
| FigureS59. | ECD spectrum of compound 6.....                                  | 30 |
| FigureS60. | HRESIMS spectrum of compound 7.....                              | 31 |
| FigureS61. | $^1\text{H}$ NMR spectrum of compound 7.....                     | 31 |
| FigureS62. | $^{13}\text{C}$ NMR spectrum of compound 7.....                  | 32 |
| FigureS63. | HSQC NMR spectrum of compound 7 .....                            | 32 |
| FigureS64. | HMBC NMR spectrum of compound 7 .....                            | 33 |
| FigureS65. | $^1\text{H}$ - $^1\text{H}$ COSY NMR spectrum of compound 7..... | 33 |
| FigureS66. | NOESY NMR spectrum of compound 7.....                            | 34 |
| FigureS67. | UV spectrum of compound 7 .....                                  | 34 |
| FigureS68. | IR spectrum of compound 7 .....                                  | 35 |
| FigureS69. | ECD spectrum of compound 7.....                                  | 35 |
| FigureS70. | HRESIMS spectrum of compound 8.....                              | 36 |
| FigureS71. | $^1\text{H}$ NMR spectrum of compound 8.....                     | 36 |
| FigureS72. | $^{13}\text{C}$ NMR spectrum of Compound 8.....                  | 37 |
| FigureS73. | HSQC NMR spectrum of compound 8 .....                            | 37 |
| FigureS74. | HMBC NMR spectrum of compound 8 .....                            | 38 |
| FigureS75. | $^1\text{H}$ - $^1\text{H}$ COSY NMR spectrum of compound 8..... | 38 |
| FigureS76. | NOESY NMR spectrum of compound 8.....                            | 39 |
| FigureS77. | UV spectrum of compound 8 .....                                  | 39 |
| FigureS78. | ECD spectrum of compound 8.....                                  | 40 |
| FigureS79. | HRESIMS spectrum of compound 9.....                              | 41 |
| FigureS80. | $^1\text{H}$ NMR spectrum of compound 9.....                     | 41 |
| FigureS81. | $^{13}\text{C}$ NMR spectrum of compound 9.....                  | 42 |
| FigureS82. | HSQC NMR spectrum of compound 9 .....                            | 42 |
| FigureS83. | HMBC NMR spectrum of compound 9 .....                            | 43 |
| FigureS84. | $^1\text{H}$ - $^1\text{H}$ COSY NMR spectrum of compound 9..... | 43 |
| FigureS85. | NOESY NMR spectrum of compound 9.....                            | 44 |

|            |                                                                                                                                                                                          |    |
|------------|------------------------------------------------------------------------------------------------------------------------------------------------------------------------------------------|----|
| FigureS86. | UV spectrum of compound 9 .....                                                                                                                                                          | 44 |
| FigureS87. | IR spectrum of compound 9 .....                                                                                                                                                          | 45 |
| FigureS88. | ECD spectrum of compound 9 .....                                                                                                                                                         | 45 |
| FigureS89. | Western blot of TGF- $\beta$ /Smad signal molecules for screening isolated compounds 1, 5, 7, 9, 10, and 11 at 25 $\mu$ M. GADPH was used as an invariant control for equal loading..... | 46 |
| FigureS90. | DFT computational optimized conformations of (1 <i>R</i> ,4 <i>R</i> ,5 <i>R</i> ,6 <i>S</i> ,7 <i>S</i> ,10 <i>R</i> ,13 <i>R</i> )-1. ....                                             | 46 |
| TableS1.   | Gibbs free energies <sup>a</sup> and equilibrium populations <sup>b</sup> of low-energy conformers of compound 1. 46                                                                     |    |
| TableS2.   | Cartesian coordinates for the low-energy reoptimized random research conformers of compound 1 at B3LYP-D3(BJ)/6-31G* level of theory in methanol. ....                                   | 47 |

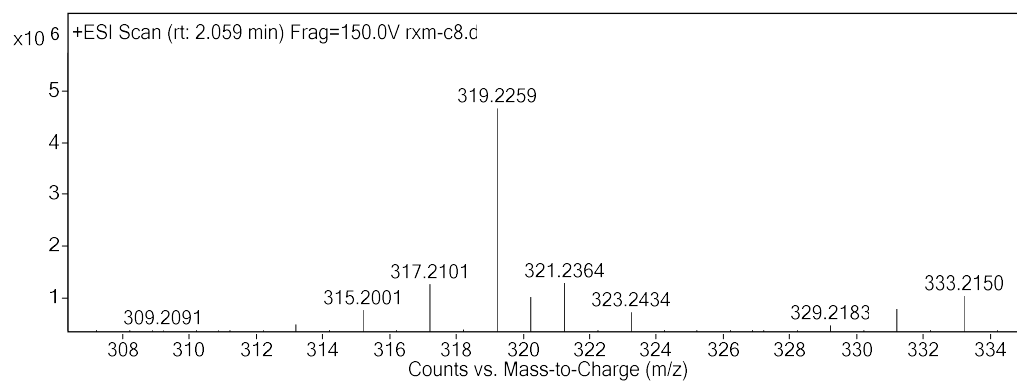

| Formular                                       | Score | Mass     | Mass<br>(MGF) | m/z<br>(Calc) | Diff<br>(ppm) | Ion<br>Formular                                | m/z      |
|------------------------------------------------|-------|----------|---------------|---------------|---------------|------------------------------------------------|----------|
| C <sub>20</sub> H <sub>30</sub> O <sub>3</sub> | 99.84 | 318.2191 | 319.2268      | 319.2268      | 1.17          | C <sub>20</sub> H <sub>31</sub> O <sub>3</sub> | 319.2259 |

**FigureS1.** HRESIMS spectrum of compound **1**.

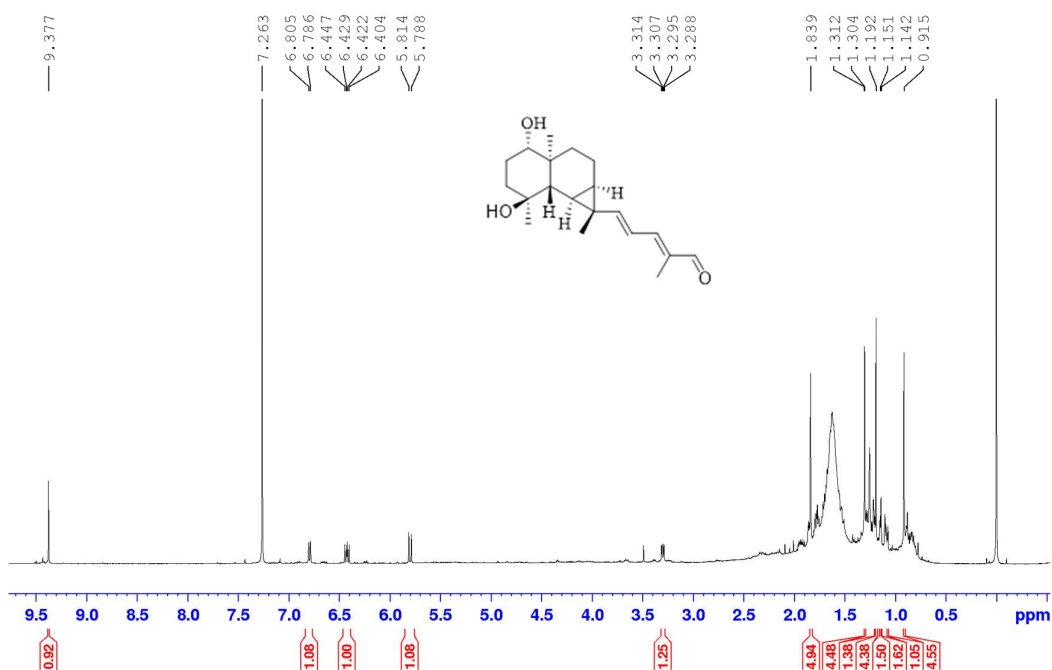

**FigureS2.** <sup>1</sup>H NMR spectrum of compound **1**

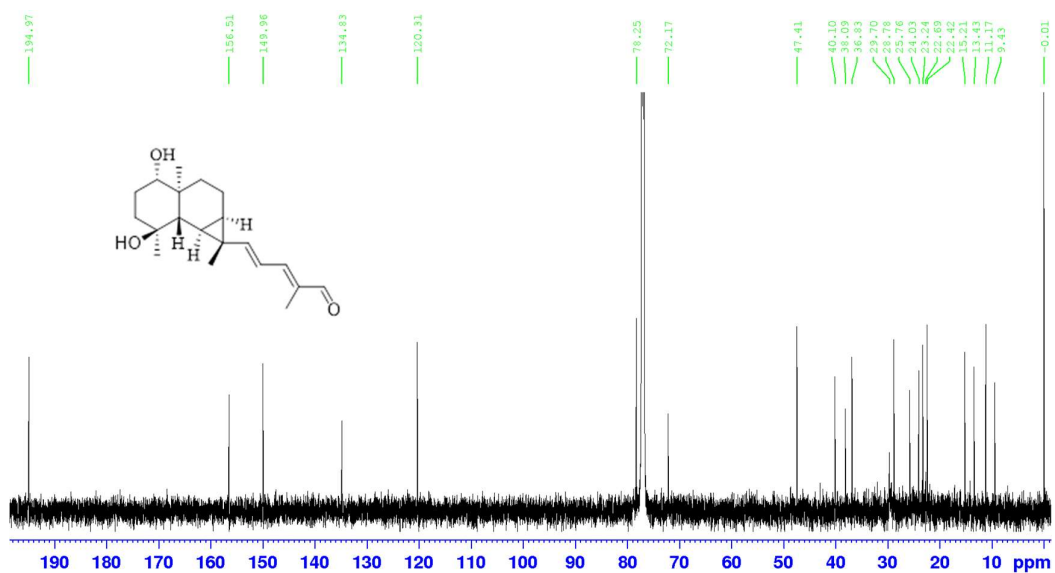

FigureS3.<sup>13</sup>C-NMR spectrum of compound 1

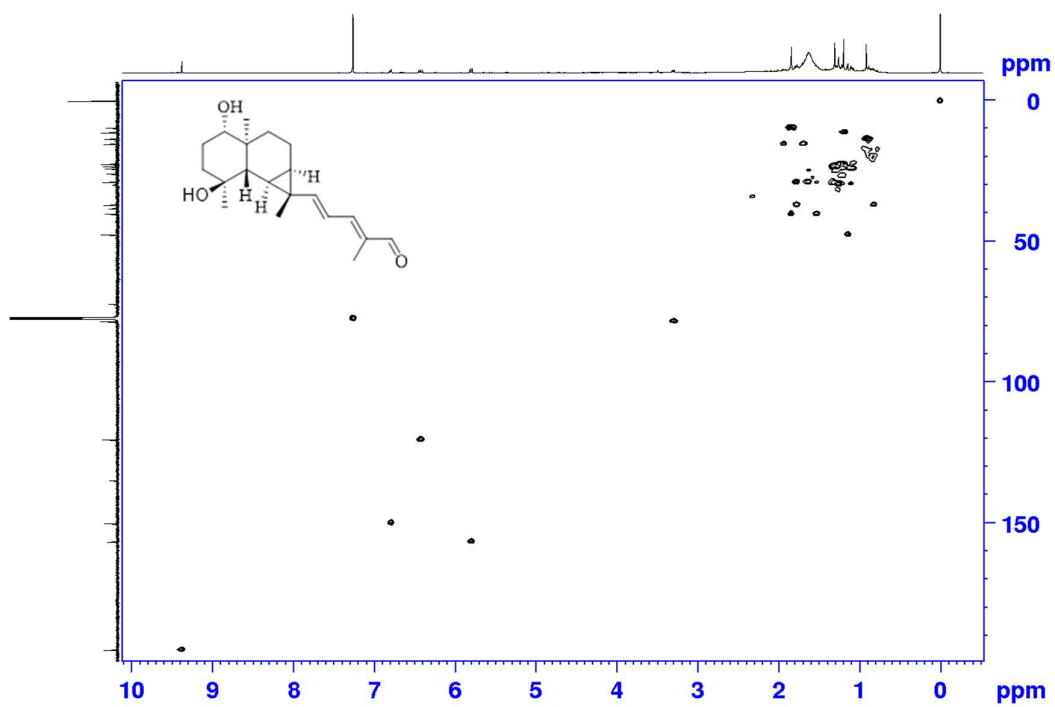

FigureS4.HSQC NMR spectrum of compound 1

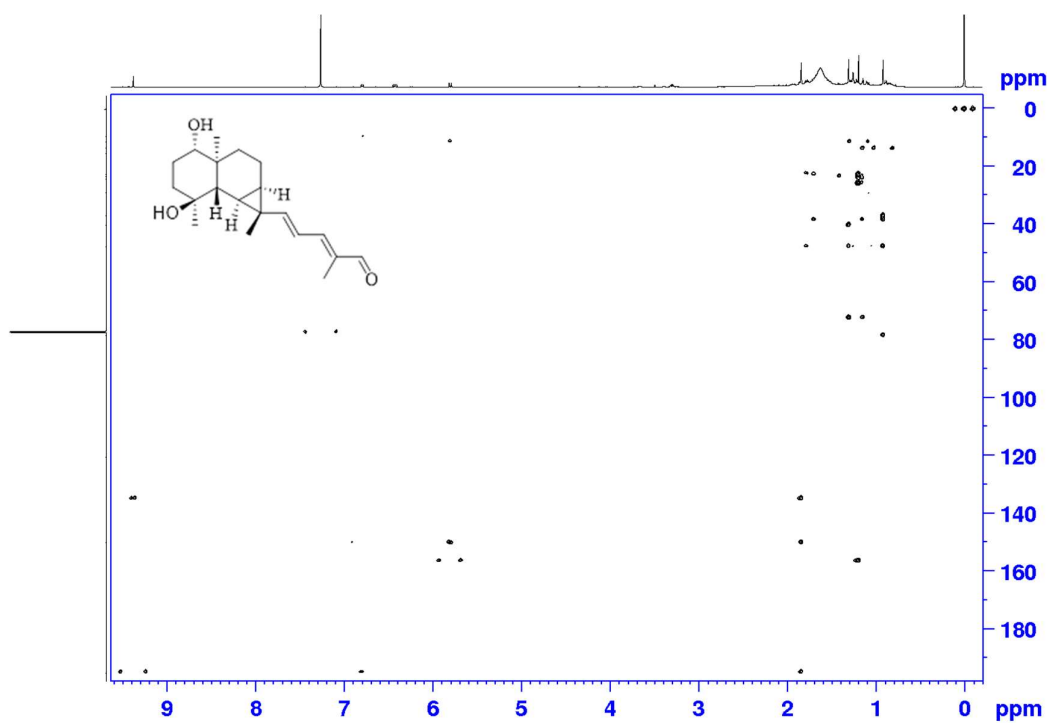

FigureS5.HMQC NMR spectrum of compound 1

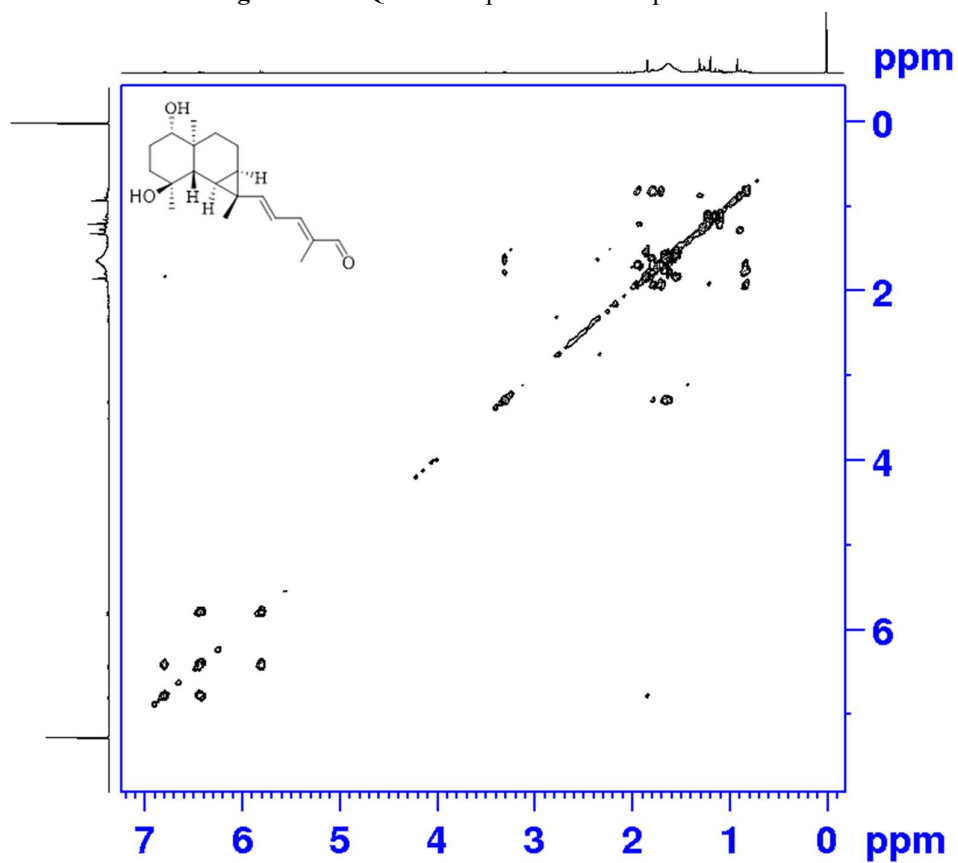

FigureS6. $^1\text{H}$ - $^1\text{H}$  COSY spectrum of compound 1

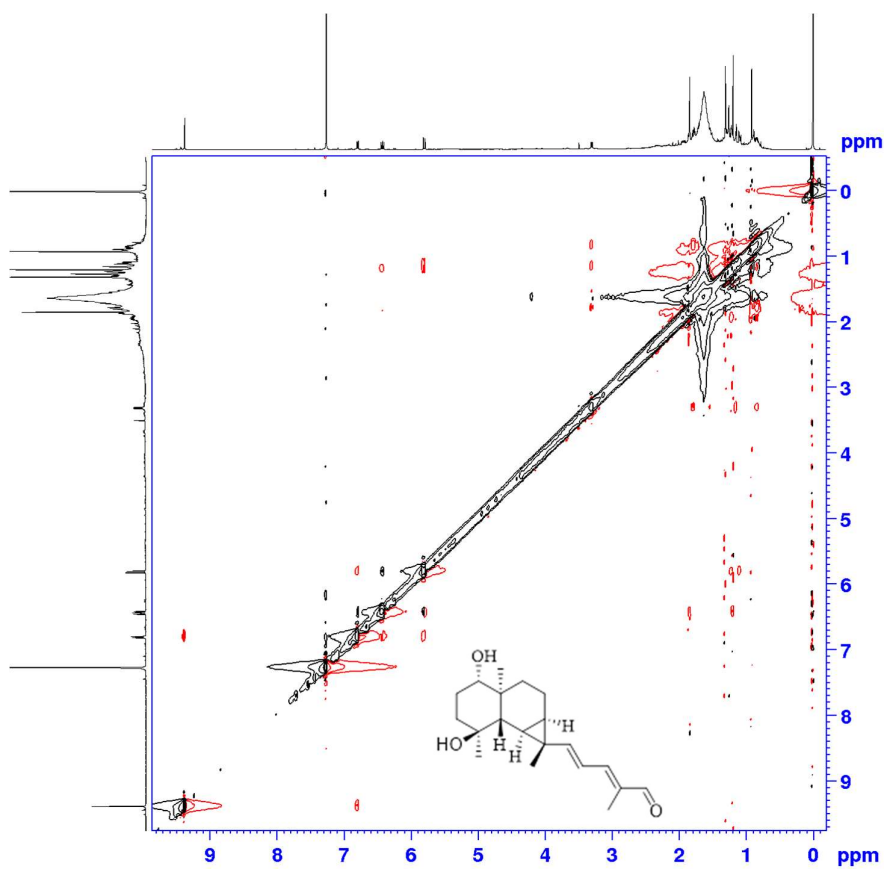

**FigureS7.**NOESY spectrum of compound **1**

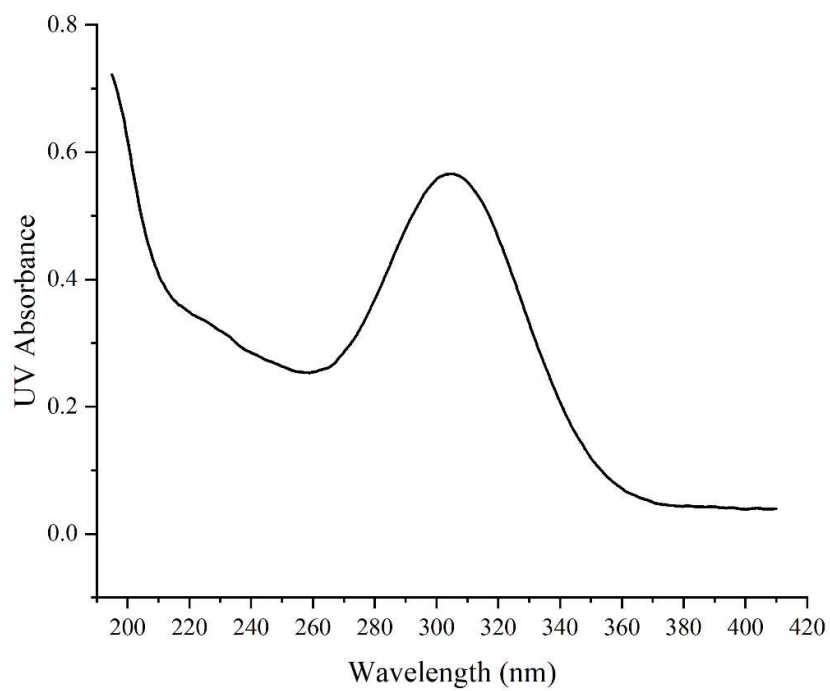

**FigureS8.** The UV spectrum of compound **1**



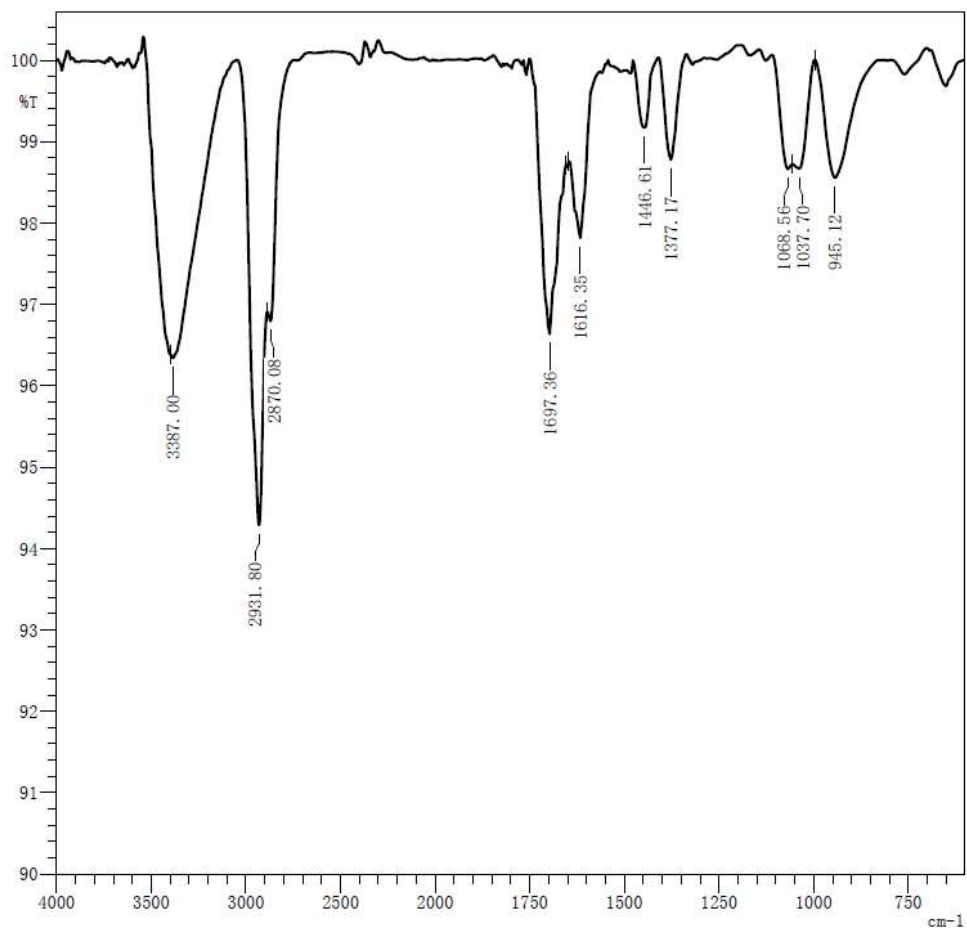

**FigureS9.**The IR spectrum of compound **1**.

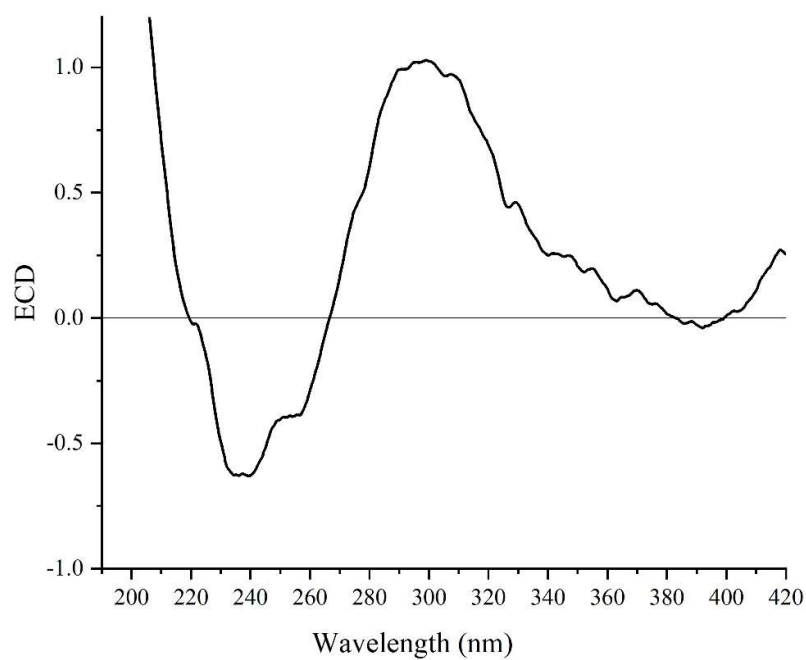

**FigureS10.** The ECD spectrum of compound **1**

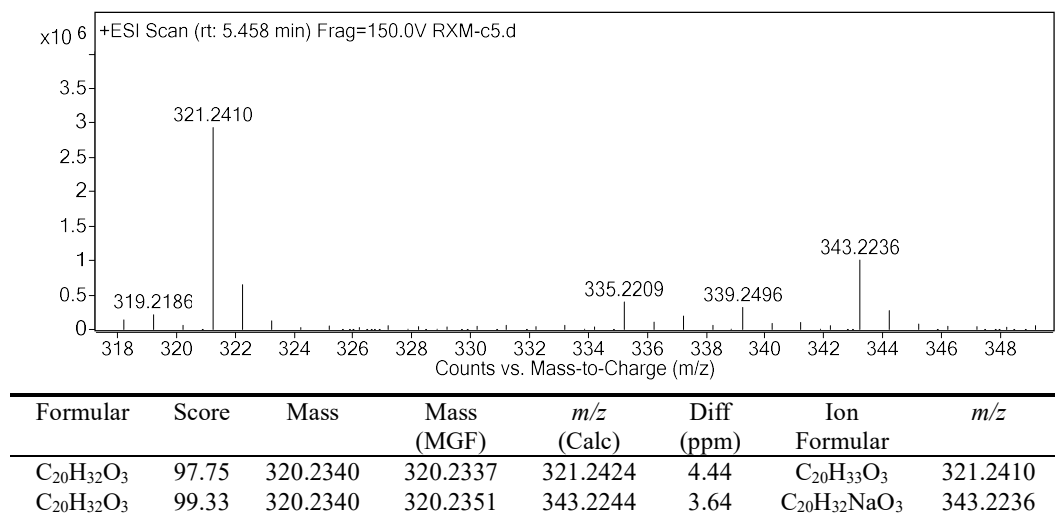

**FigureS11.** HRESIMS spectrum of compound **2**

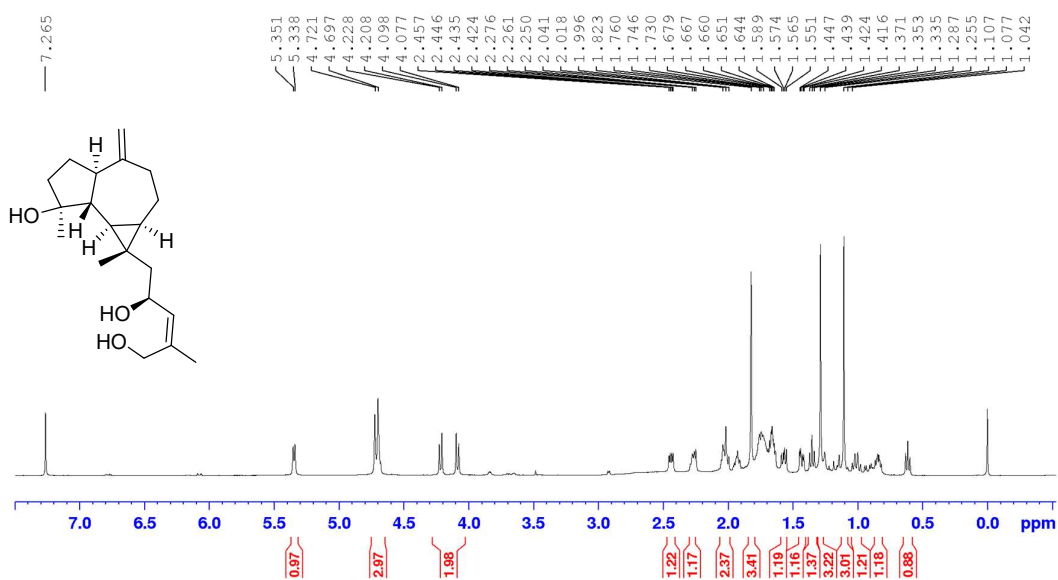

**FigureS12.** <sup>1</sup>H NMR spectrum of compound **2**.

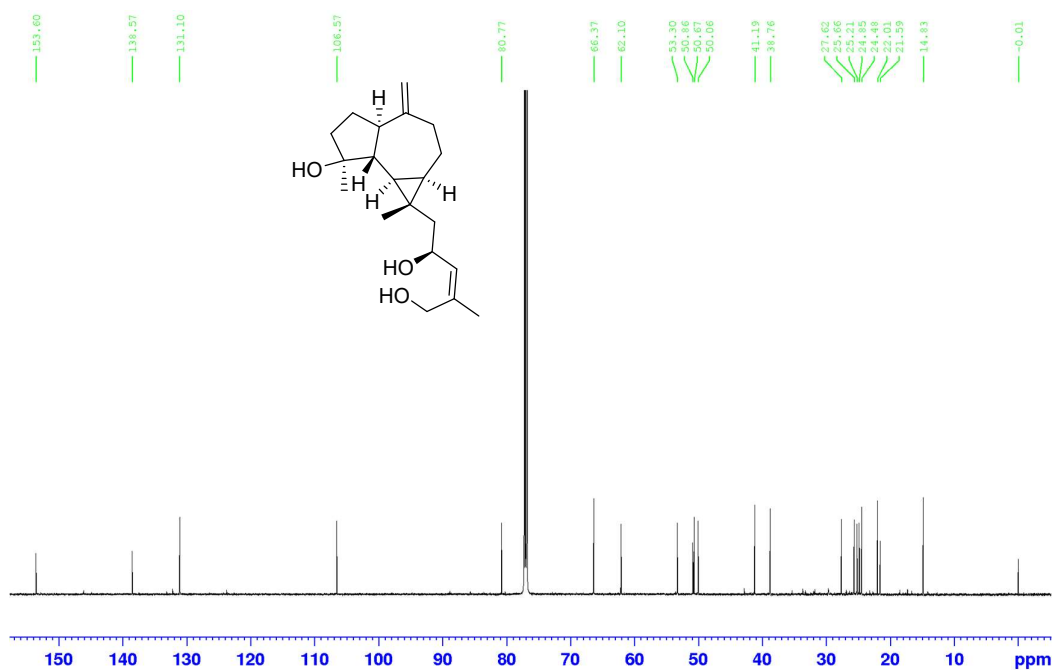

FigureS13.  $^{13}\text{C}$  NMR spectrum of compound 2

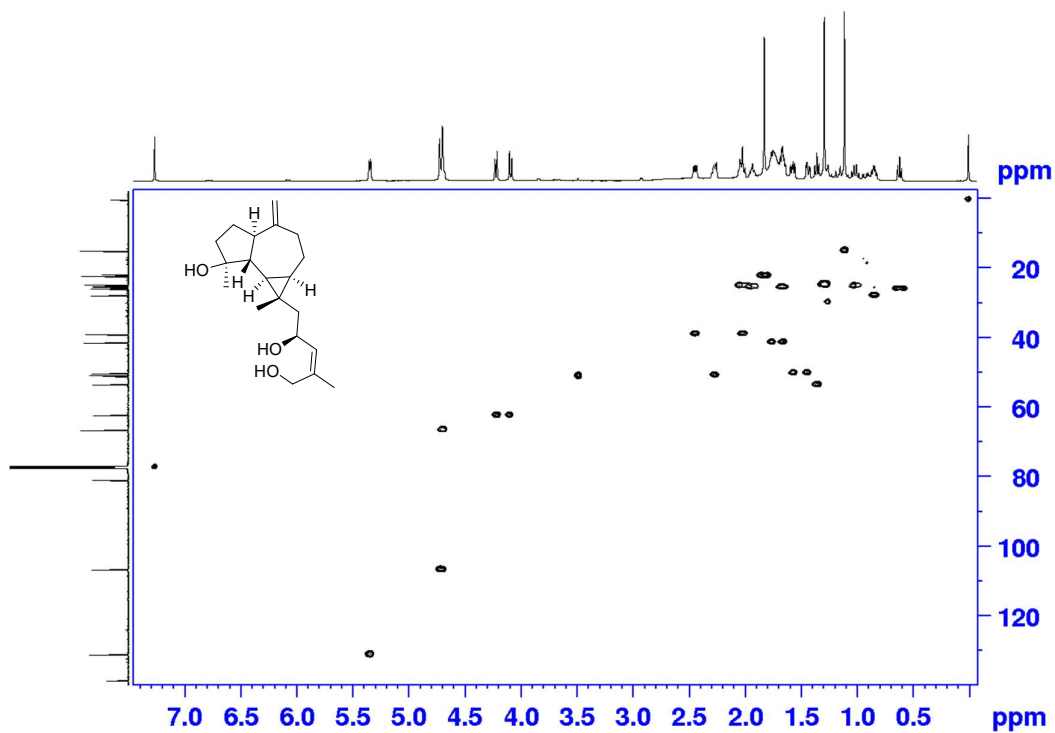

FigureS14. HSQC NMR spectrum of compound 2

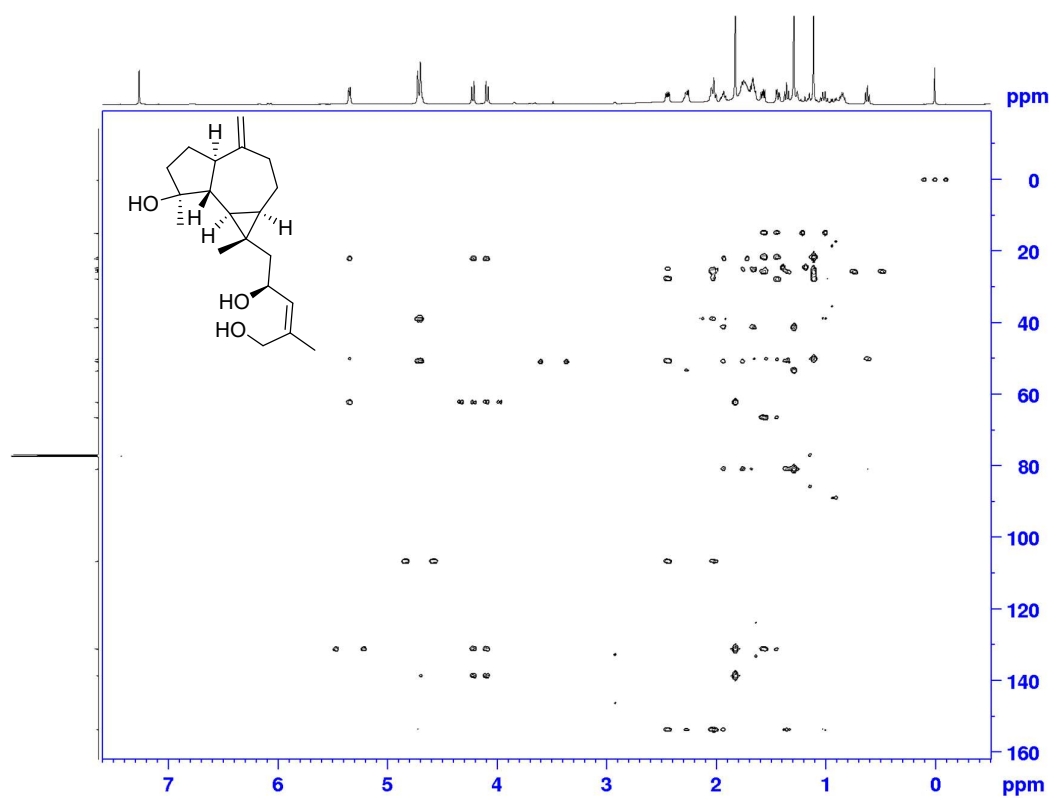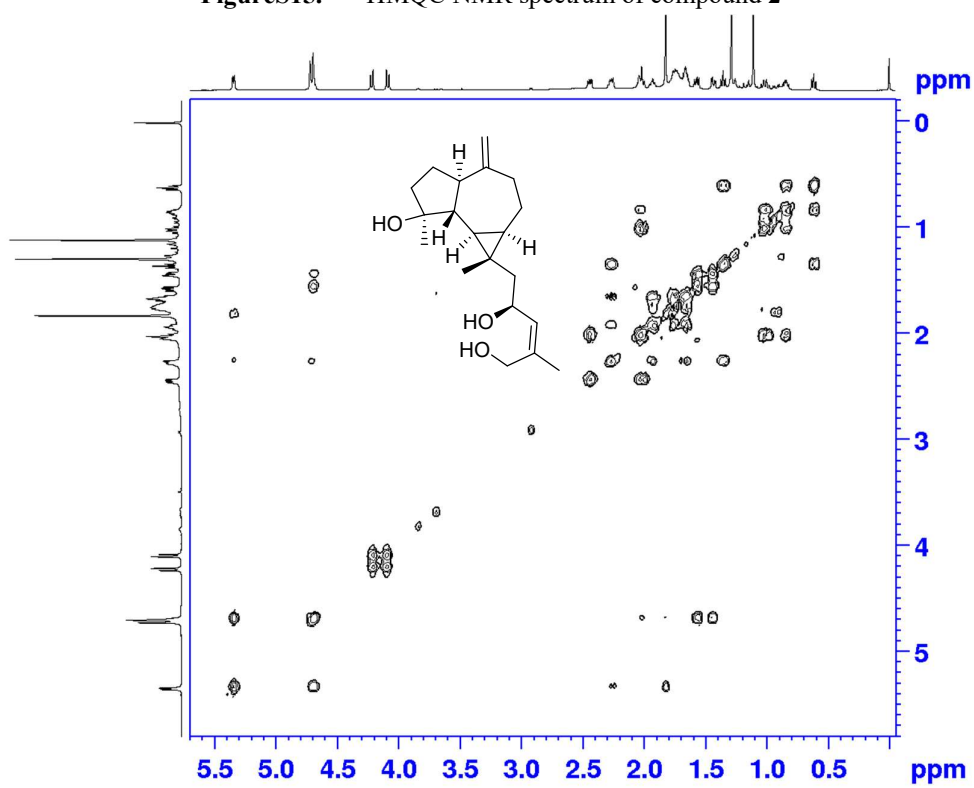

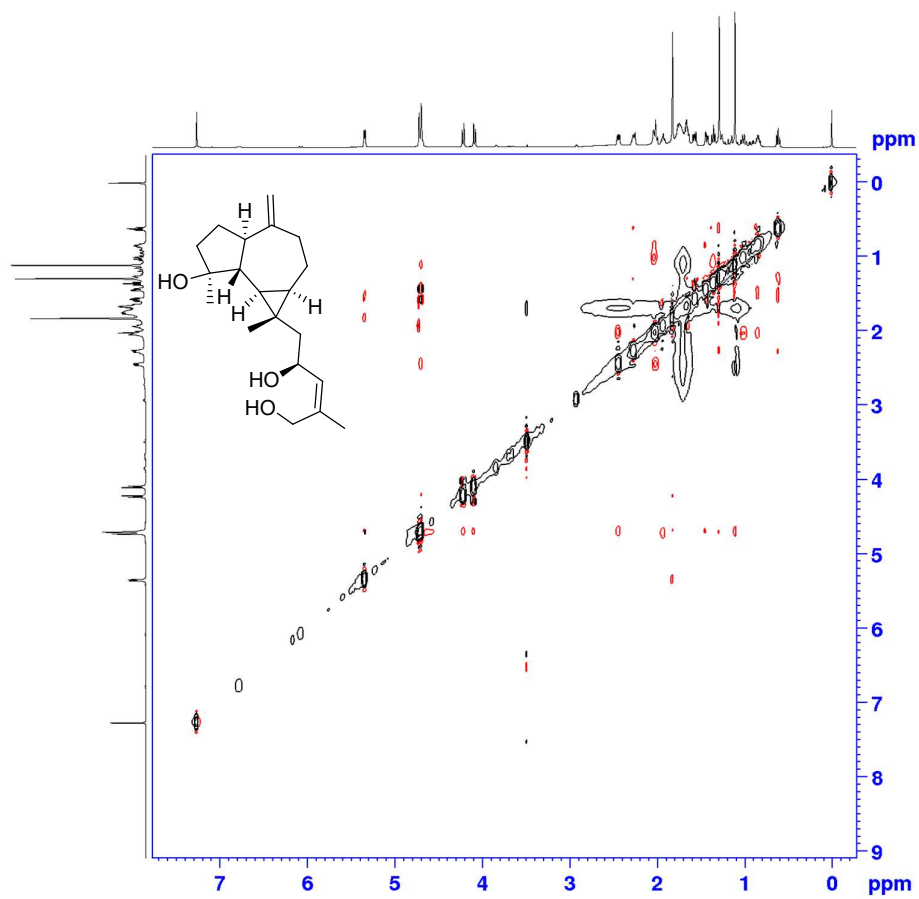

**FigureS17.** NOESY NMR spectrum of compound 2

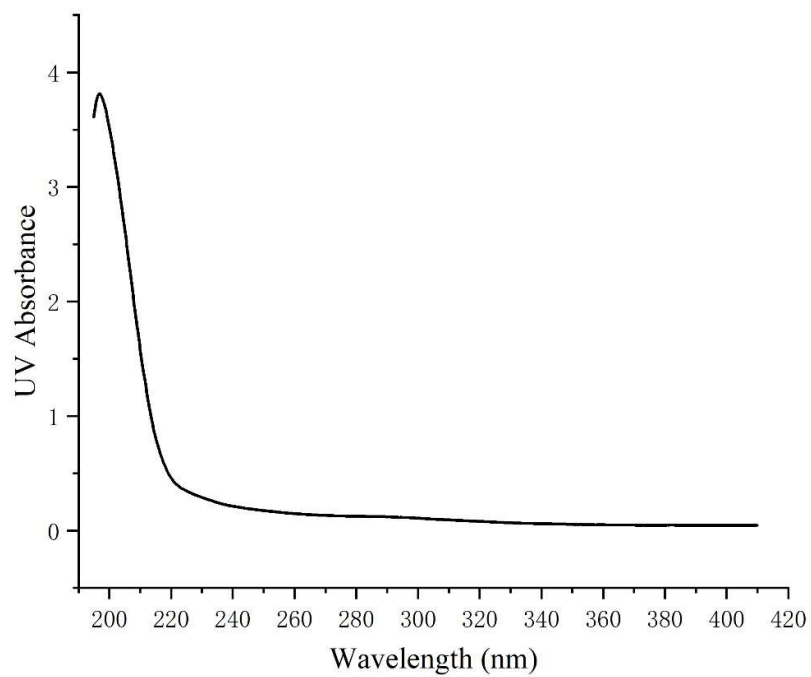

**FigureS18.** UV spectrum of compound 2.

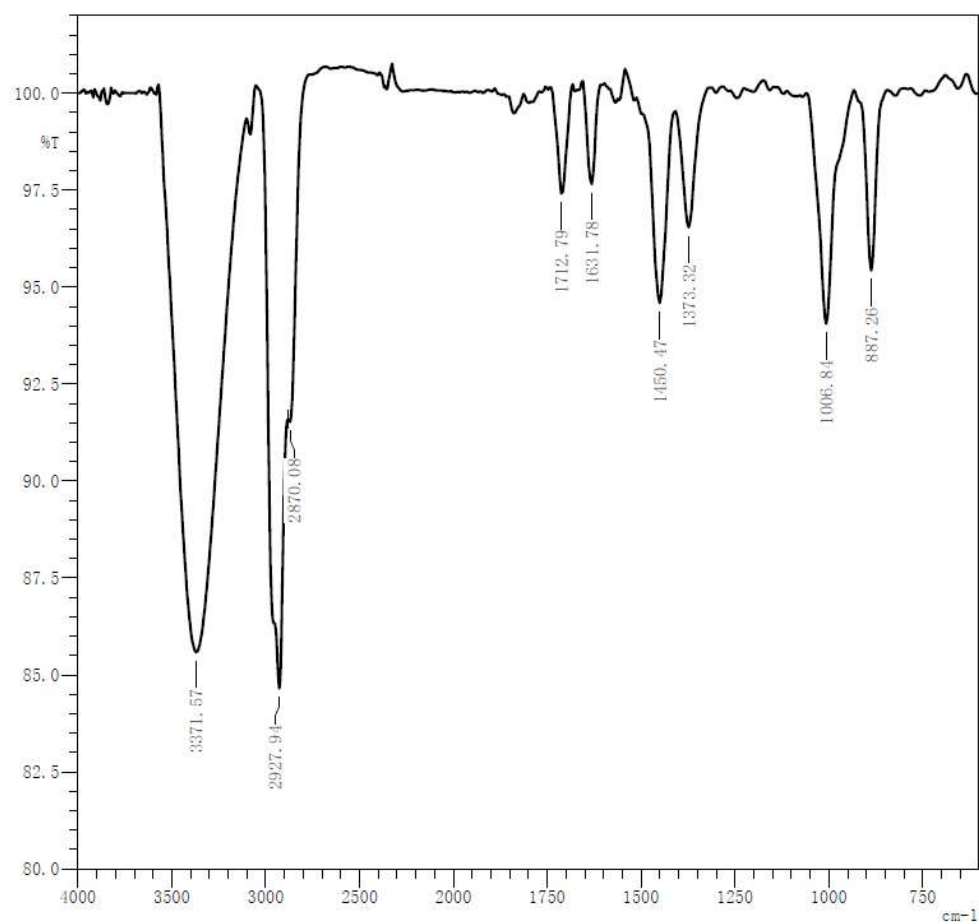

**FigureS19.** IR spectrum of compound 2.

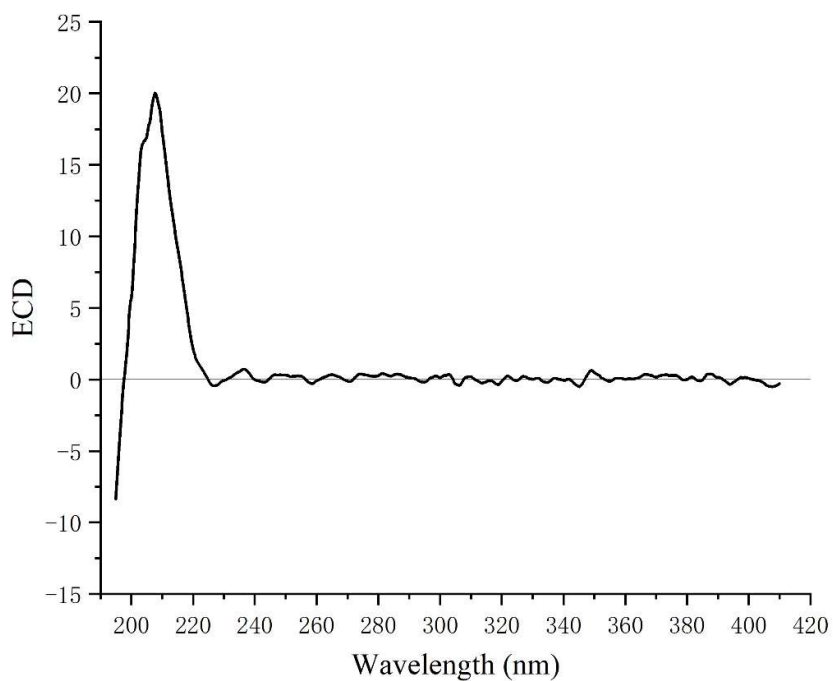

**FigureS20.** ECD spectrum of compound 2.

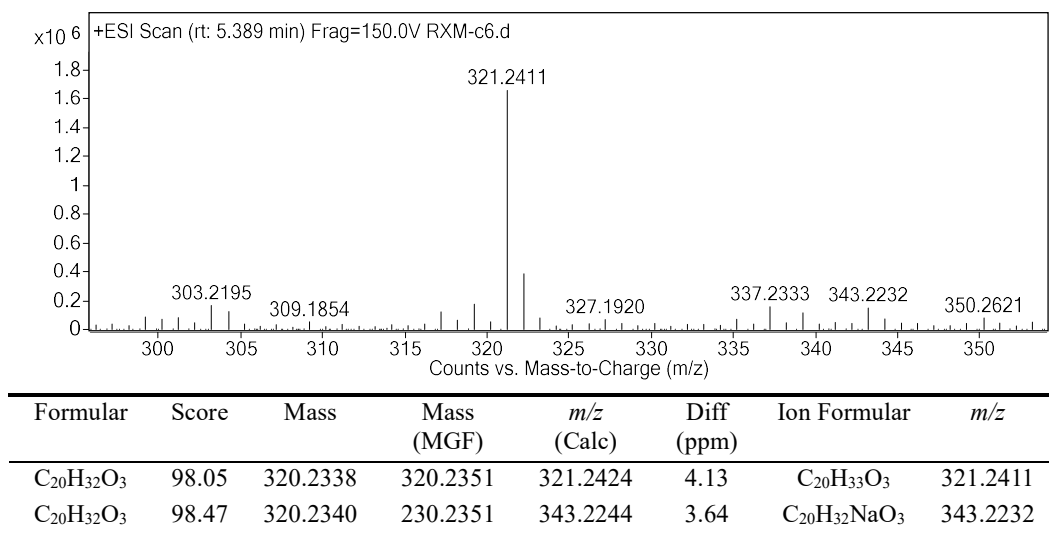

**FigureS21.** HRESIMS spectrum of compound **3**.

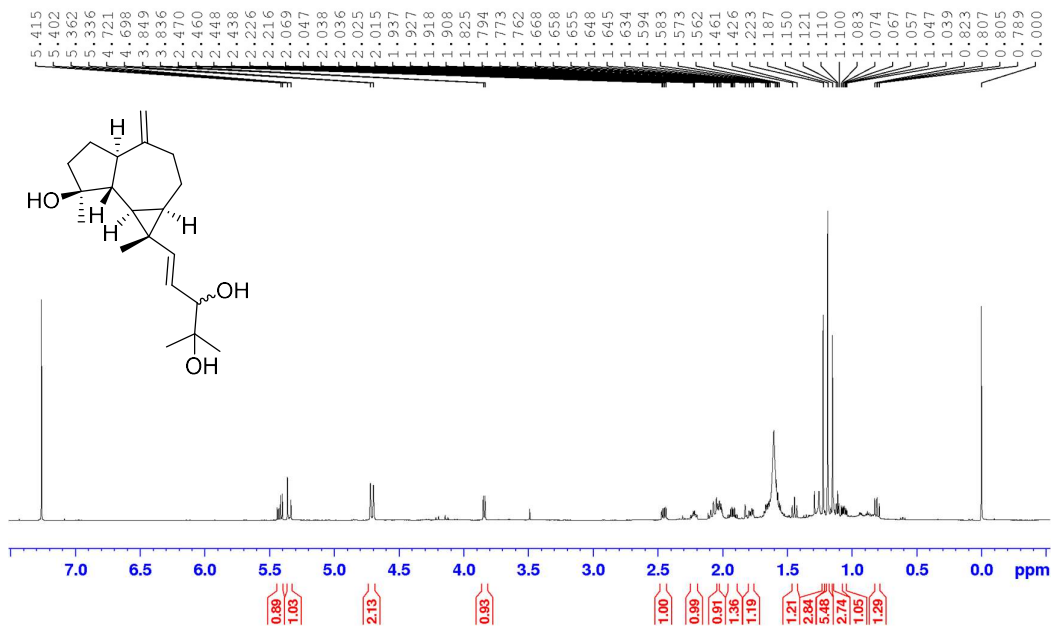

**FigureS22.** <sup>1</sup>H NMR spectrum of compound **3**

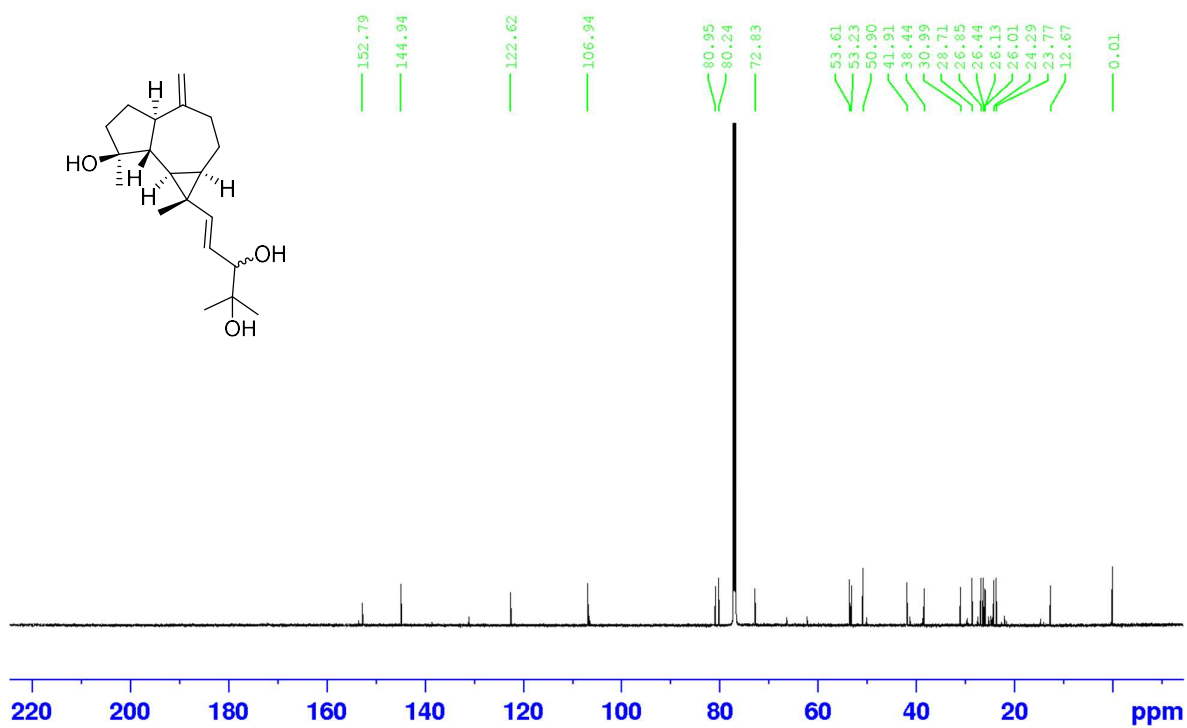

FigureS23. <sup>13</sup>C NMR spectrum of compound 3

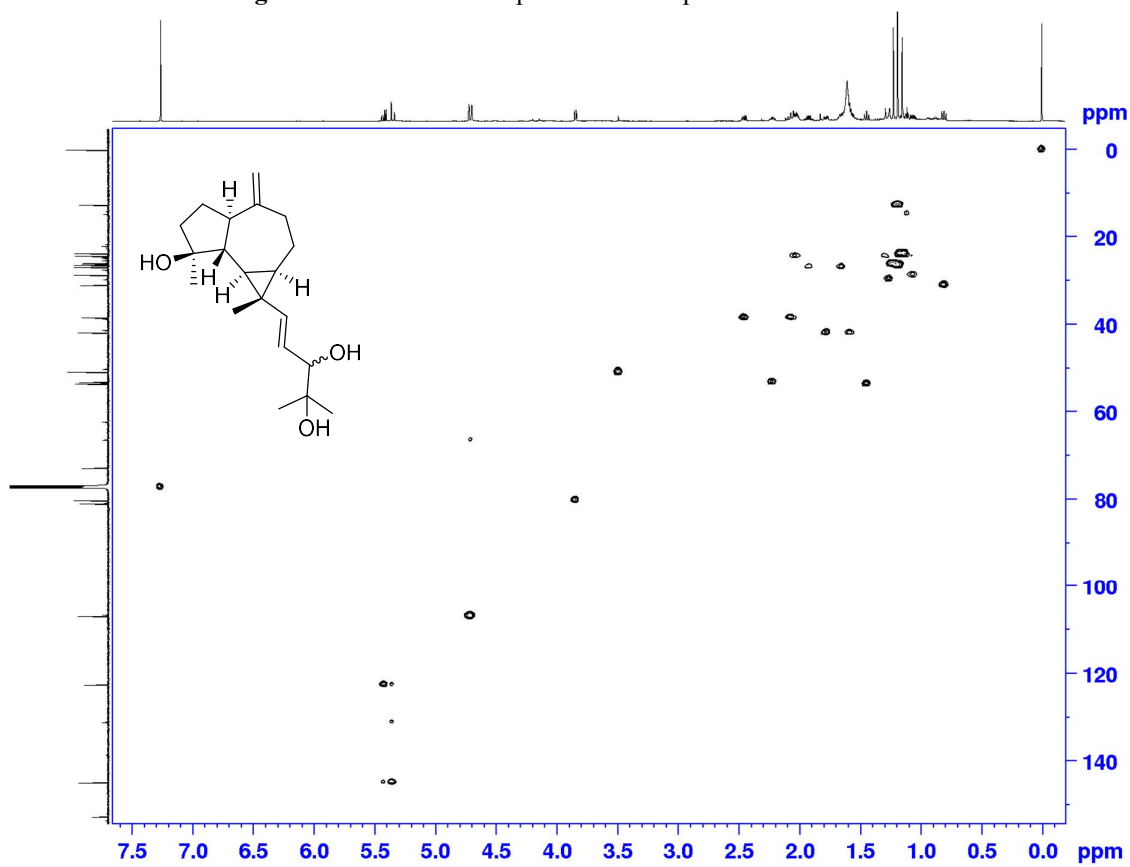

FigureS24. HSQC NMR spectrum of compound 3



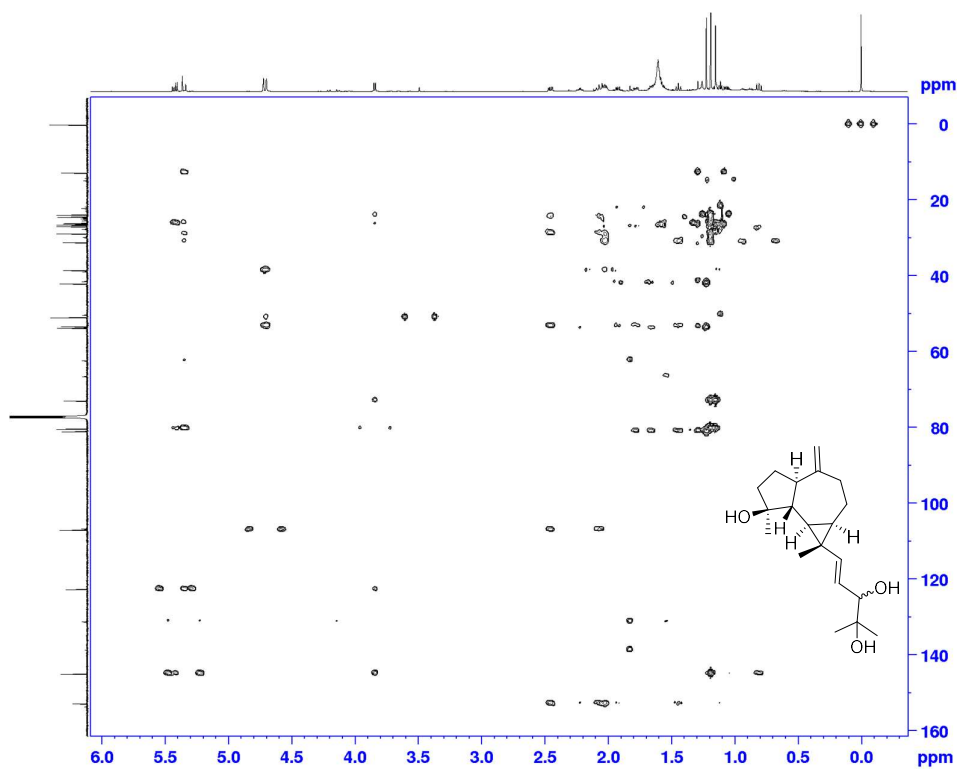

FigureS25. HMBC NMR spectrum of compound 3

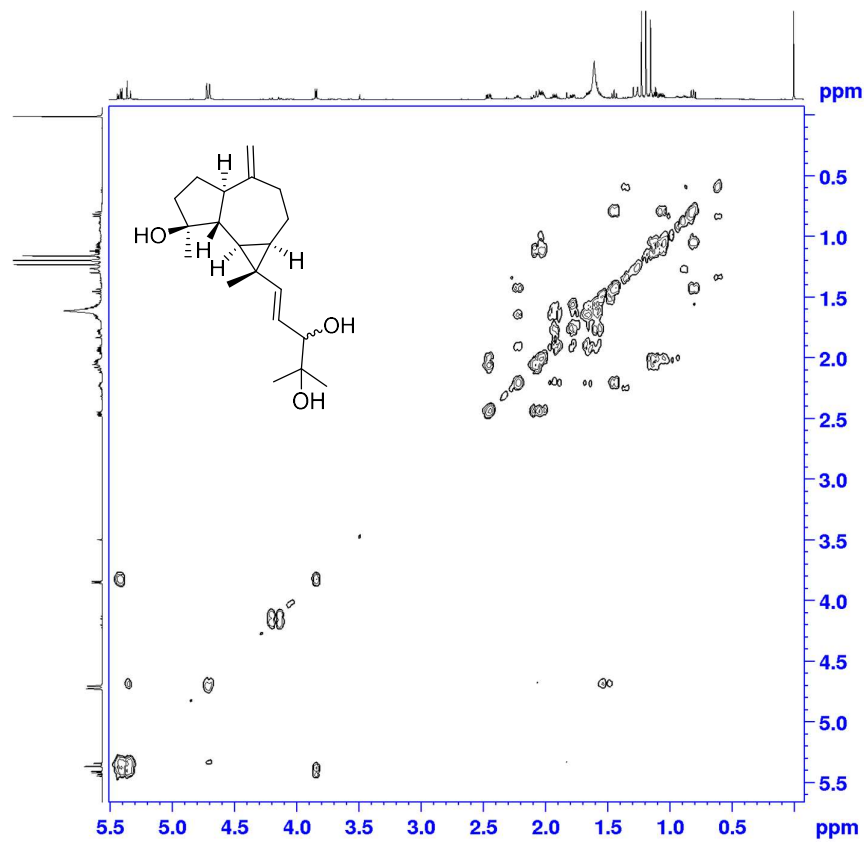

FigureS26.  $^1\text{H}$ - $^1\text{H}$  COSY NMR spectrum of compound 3

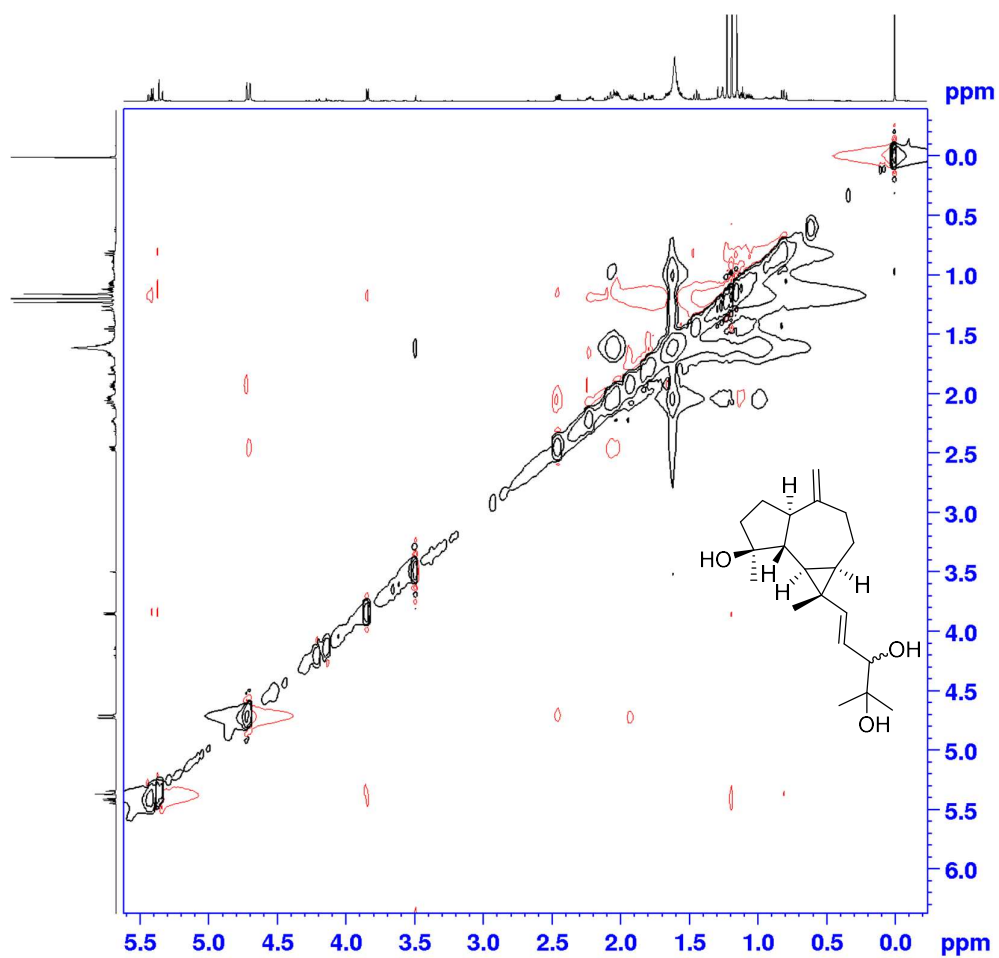

**FigureS27.** NOESY NMR spectrum of compound **3**

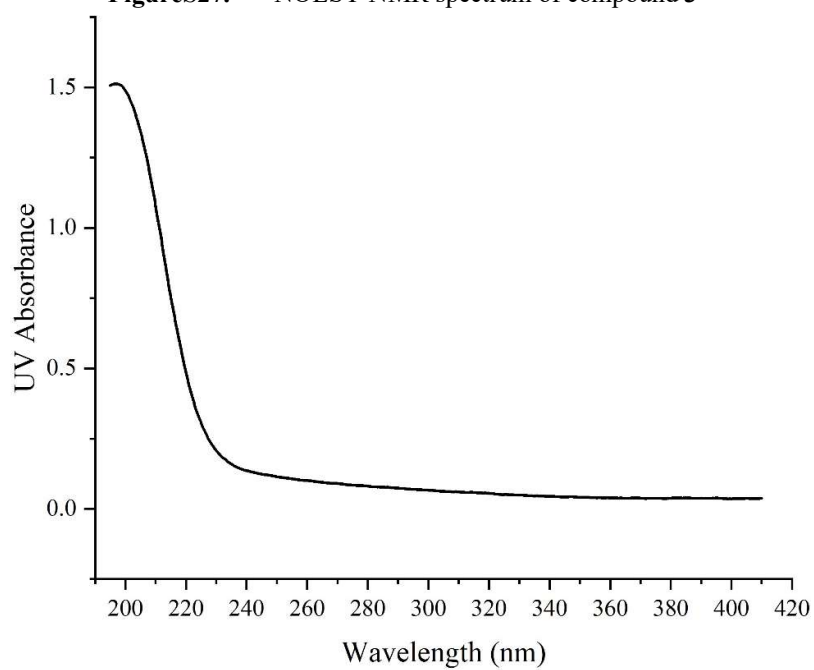

**FigureS28.** UV spectrum of compound **3**

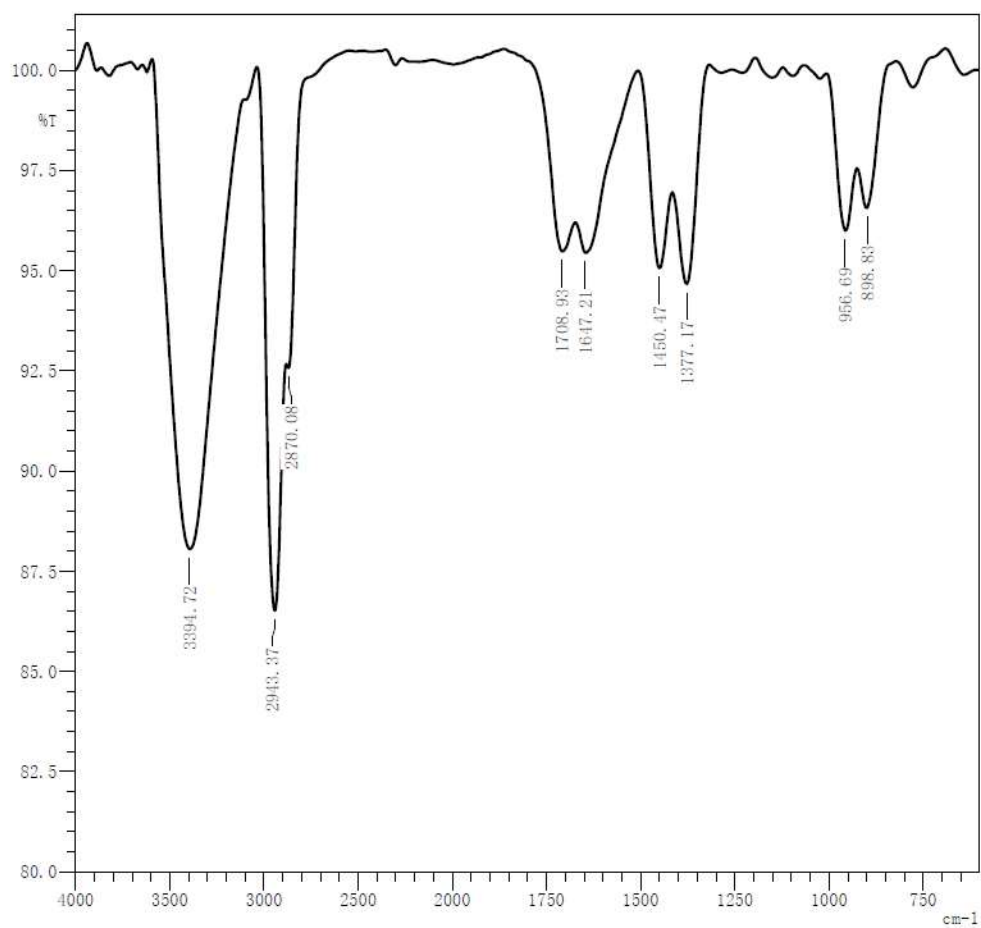

**FigureS29.** IR spectrum of compound **3**.

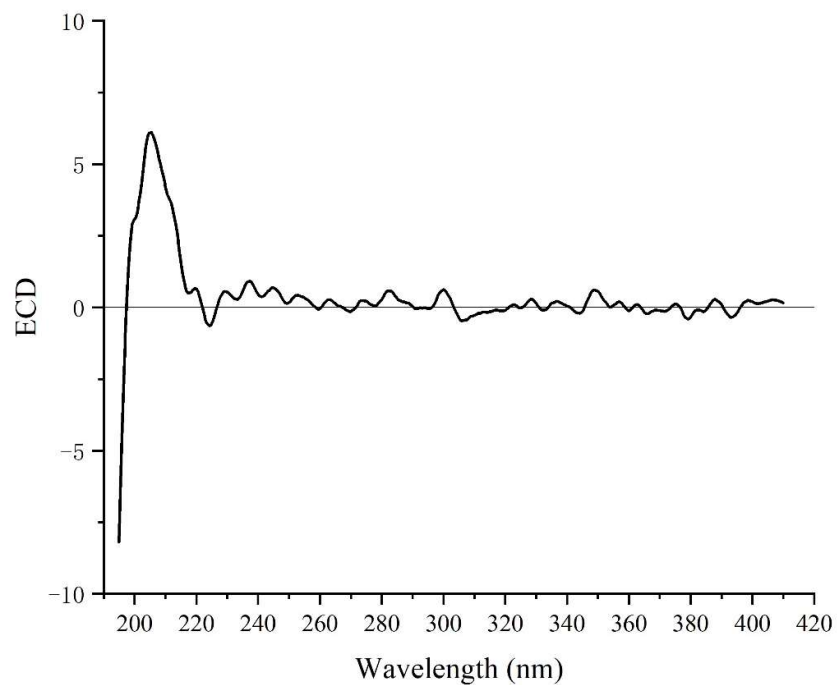

**FigureS30.** ECD spectrum of compound **3**

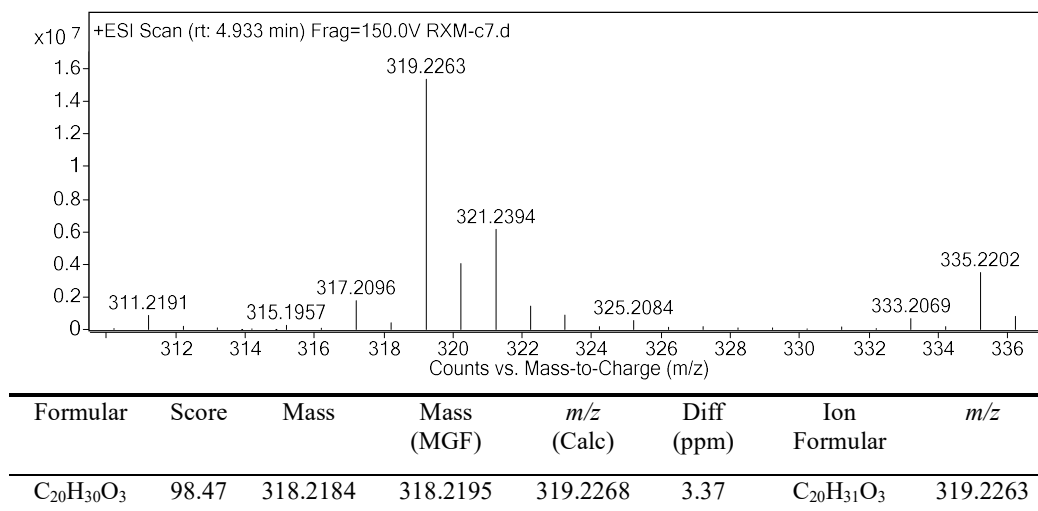

**FigureS31.** HRESIMS spectrum of compound 4.

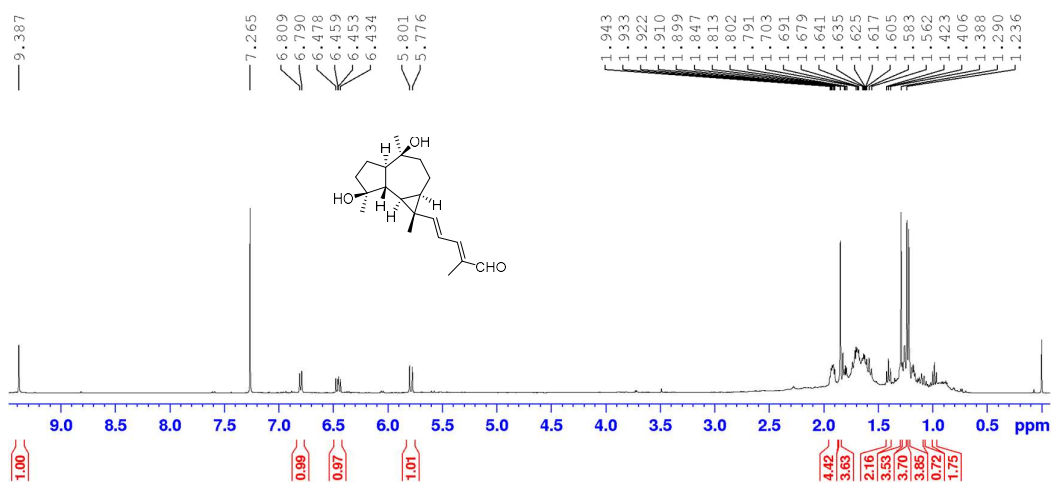

**FigureS32.** <sup>1</sup>H NMR spectrum of compound 4

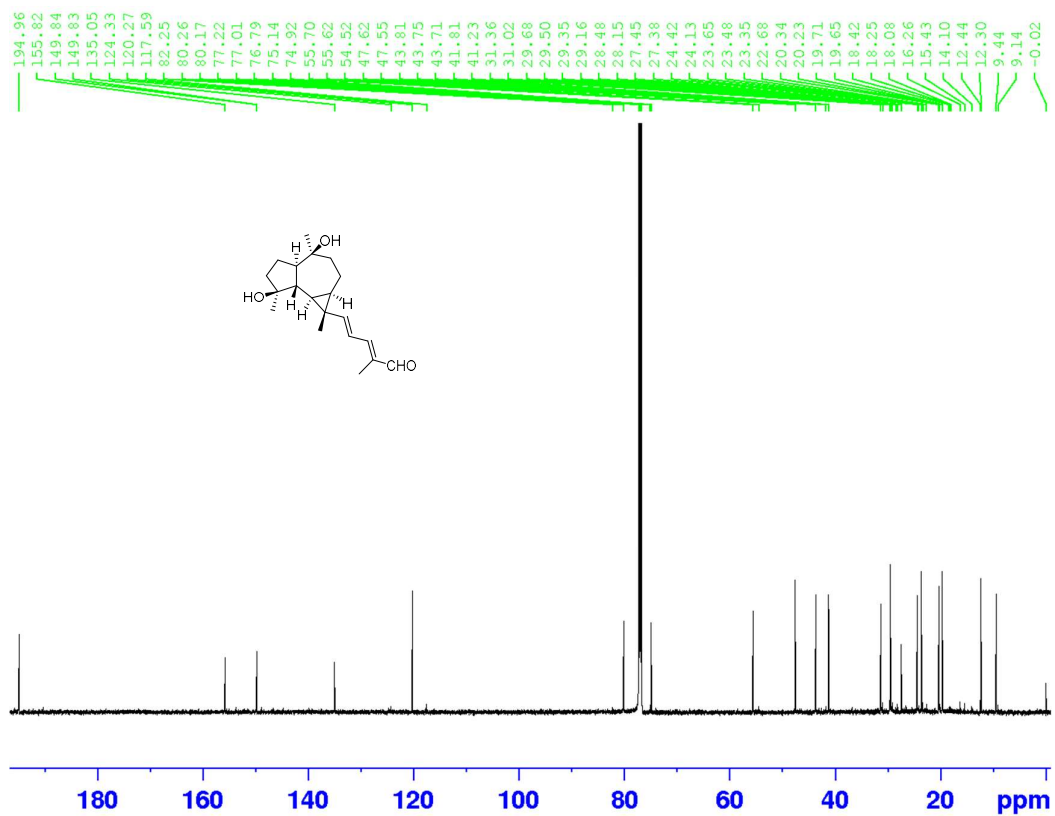

FigureS33. <sup>13</sup>C-NMR spectrum of Compound 4

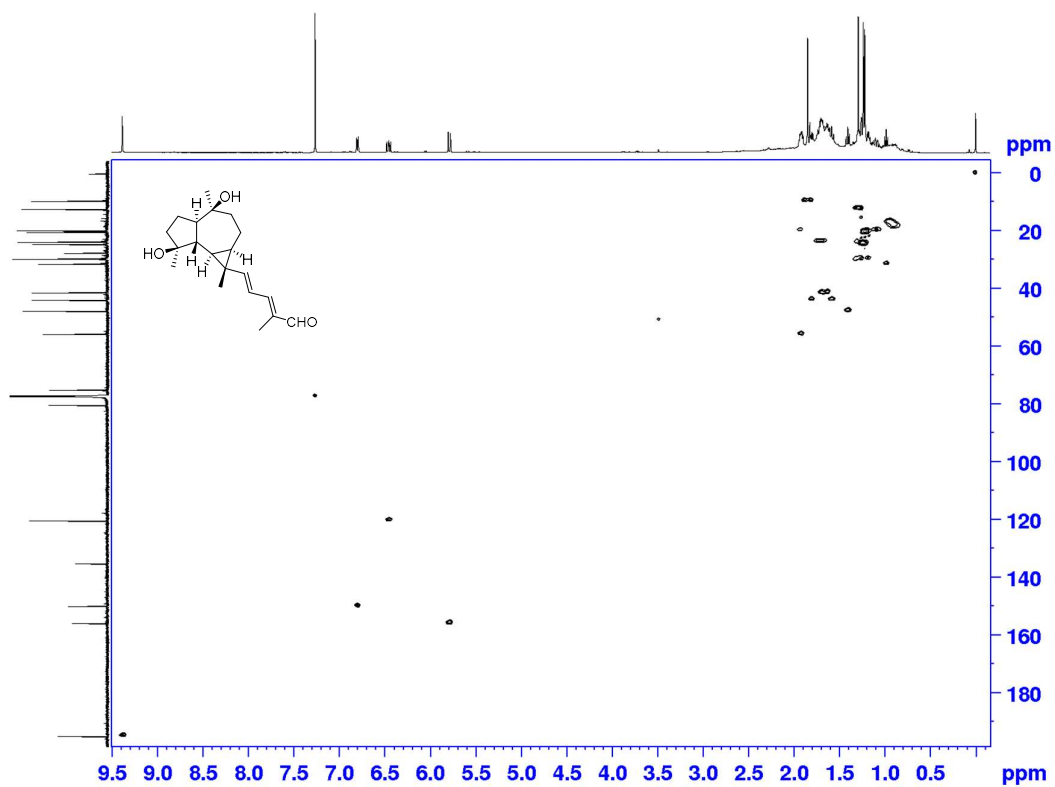

FigureS34. HSQC NMR spectrum of compound 4

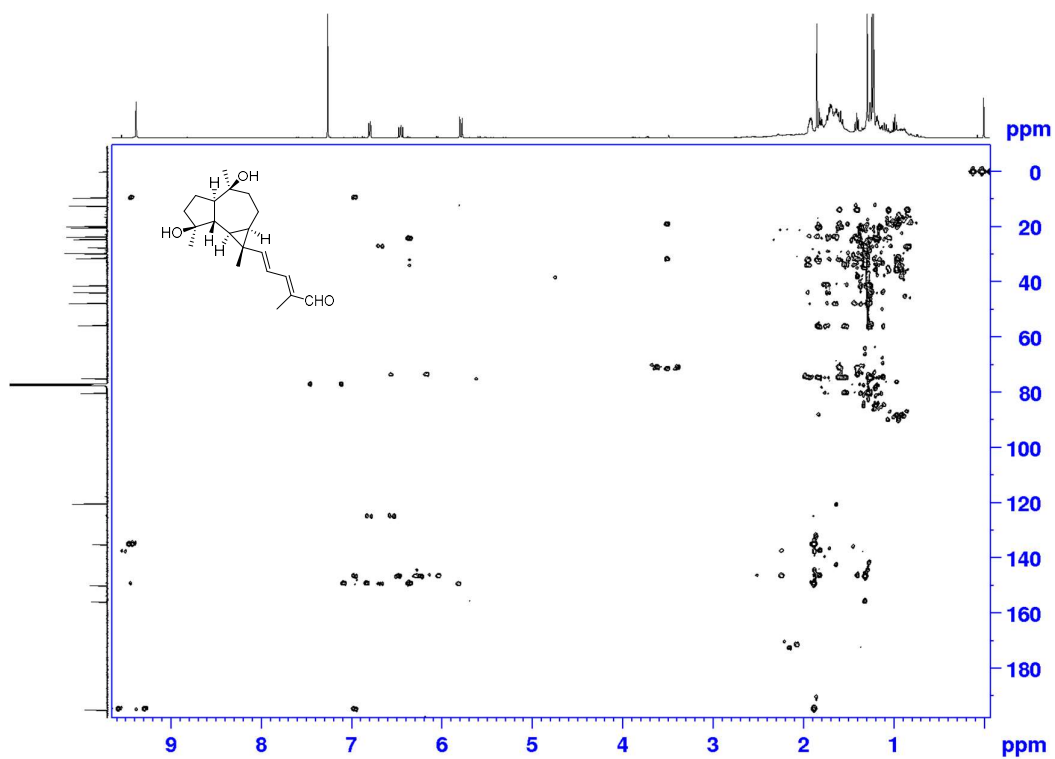

FigureS35. HMBC NMR spectrum of compound 4

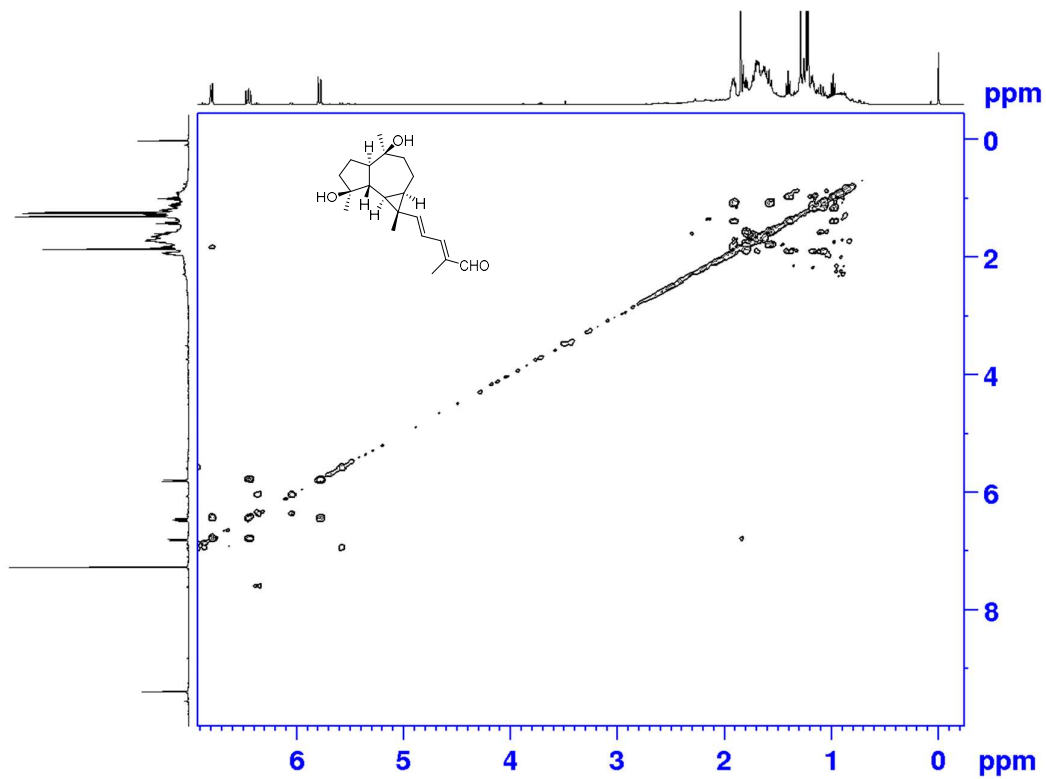

FigureS36.  $^1\text{H}$ - $^1\text{H}$  COSY NMR spectrum of compound 4

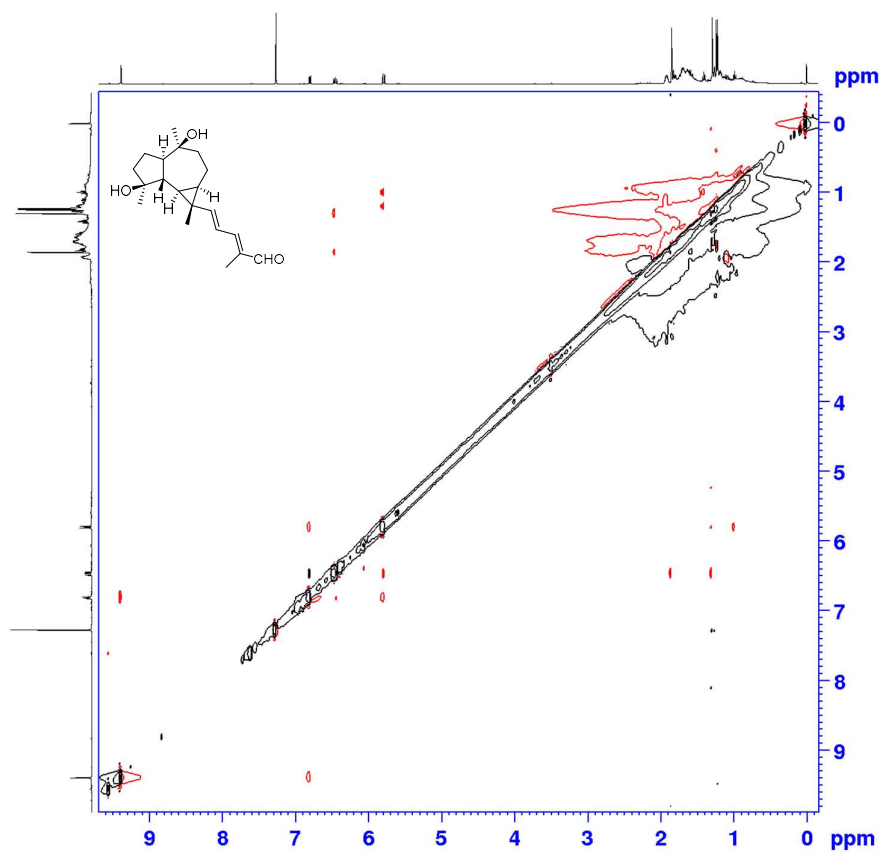

**FigureS37.** NOESY NMR spectrum of compound **4**

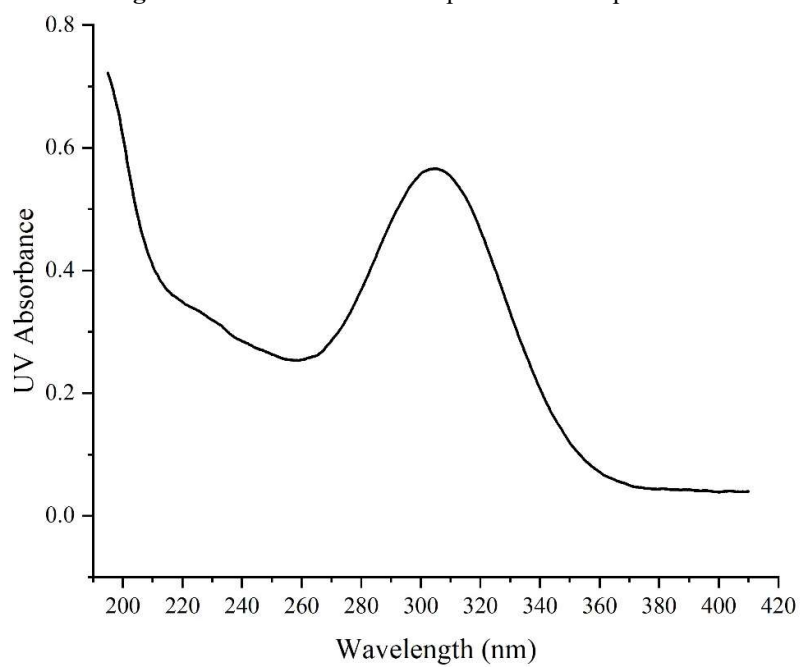

**FigureS38.** UV spectrum of compound **4**

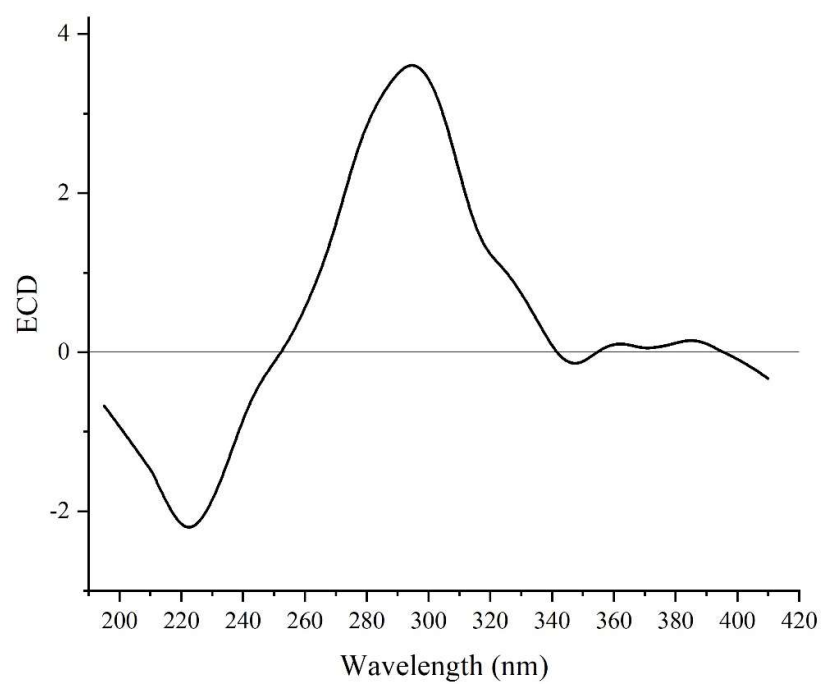

**FigureS39.** ECD spectrum of compound **4**



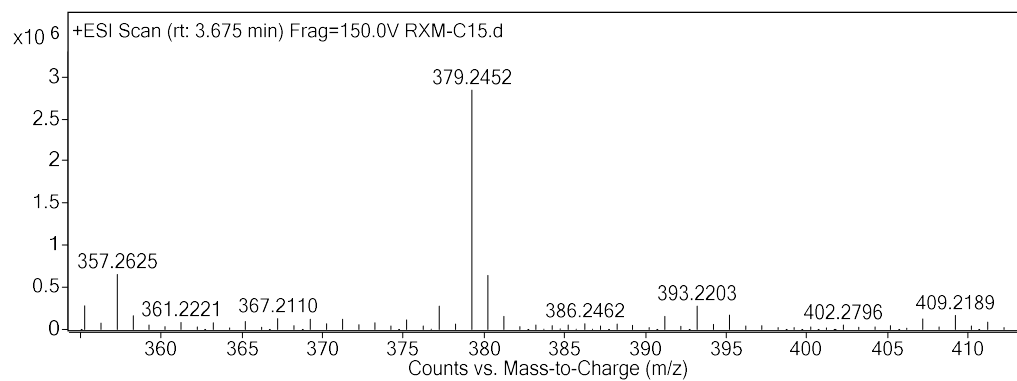

| Formular                                       | Score | Mass     | Mass (MGF) | <i>m/z</i> (Calc) | Diff (ppm) | Ion Formular                                     | <i>m/z</i> |
|------------------------------------------------|-------|----------|------------|-------------------|------------|--------------------------------------------------|------------|
| C <sub>20</sub> H <sub>36</sub> O <sub>5</sub> | 98.90 | 356.2552 | 356.2563   | 357.2636          | 2.95       | C <sub>20</sub> H <sub>37</sub> O <sub>5</sub>   | 357.2625   |
| C <sub>20</sub> H <sub>36</sub> O <sub>5</sub> | 99.91 | 356.2560 | 356.2563   | 379.2455          | 0.83       | C <sub>20</sub> H <sub>36</sub> NaO <sub>5</sub> | 379.2452   |

**FigureS40.** HRESIMS spectrum of compound **5**.

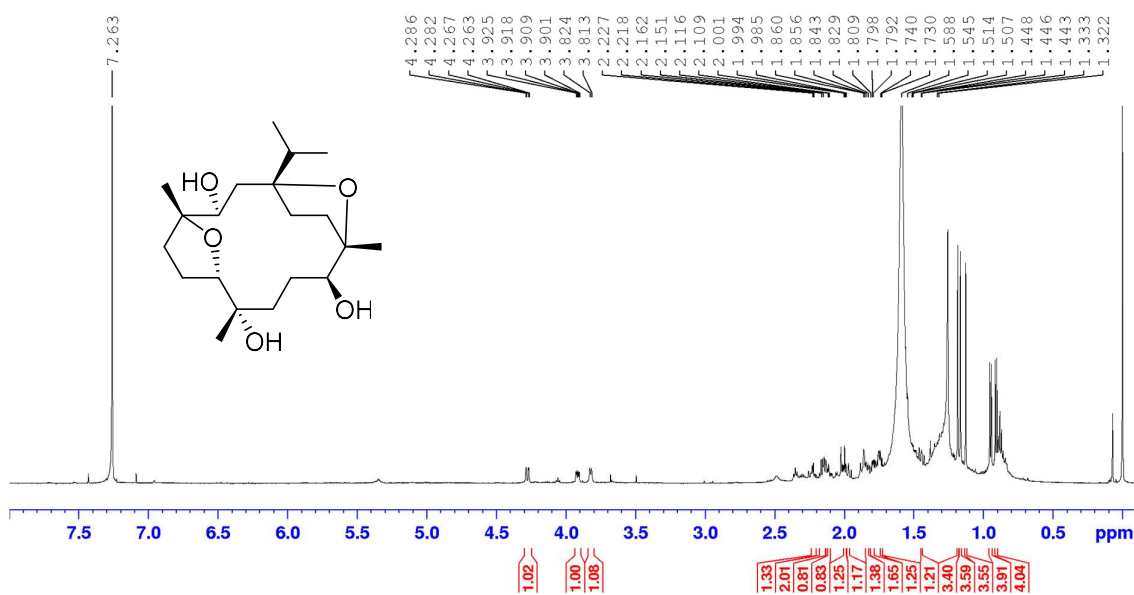

**FigureS41.** <sup>1</sup>H NMR spectrum of compound **5**

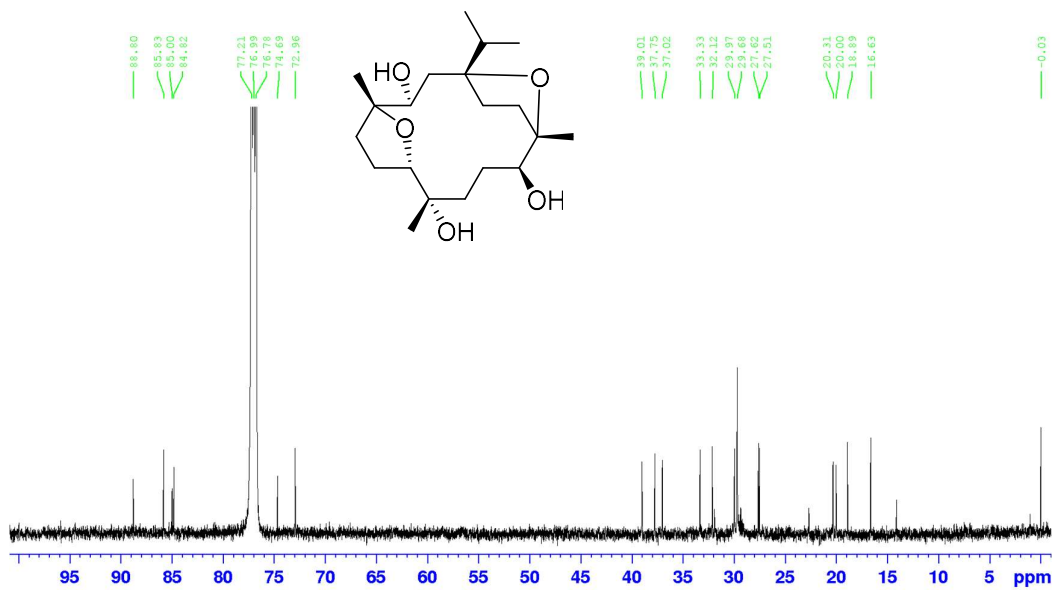

FigureS42.  $^{13}\text{C}$  NMR spectrum of compound 5

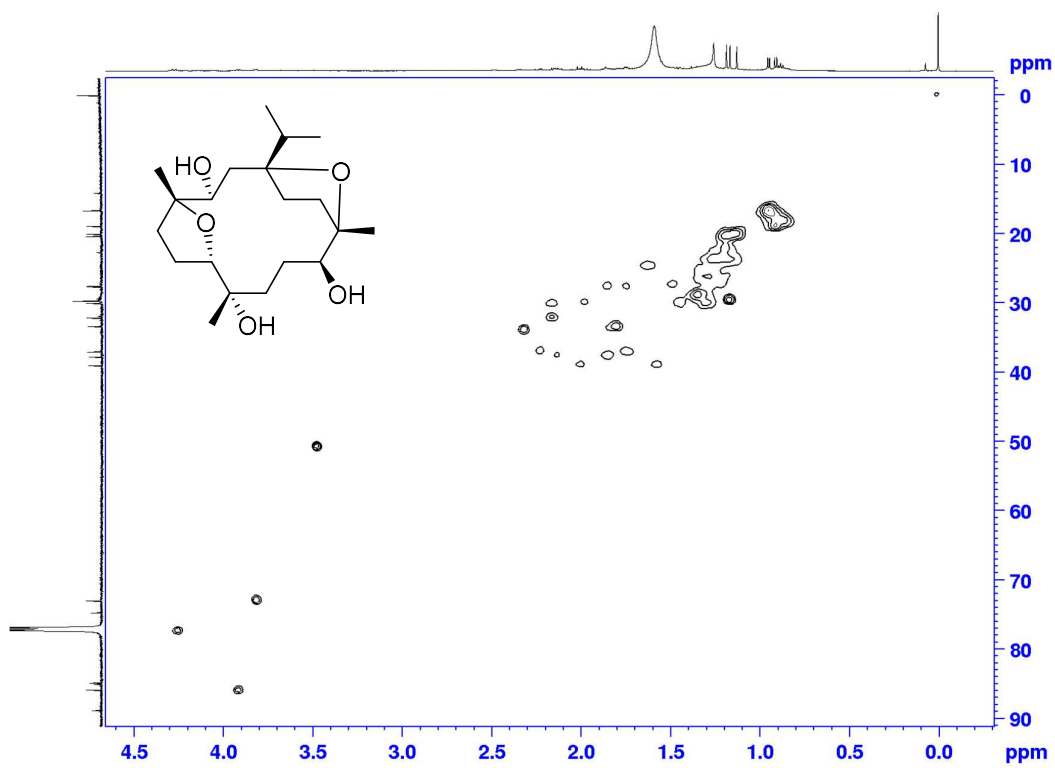

FigureS43. HSQC NMR spectrum of compound 5

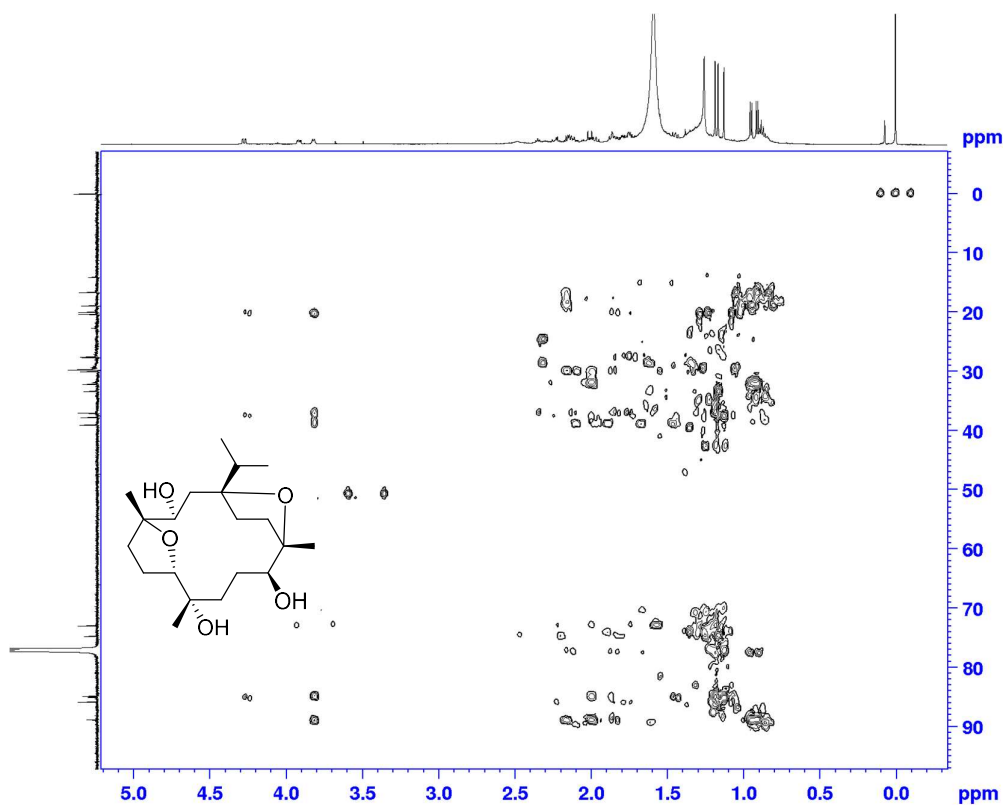

FigureS44. HMBC NMR spectrum of compound 5

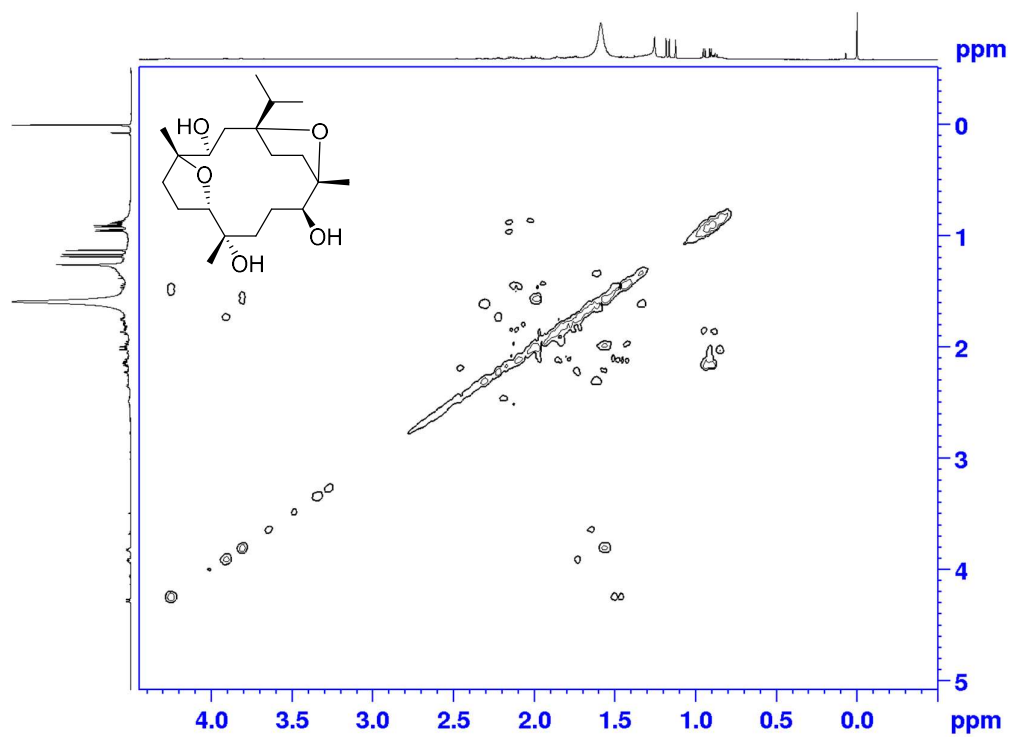

FigureS45.  $^1\text{H}$ - $^1\text{H}$  COSY NMR spectrum of compound 5

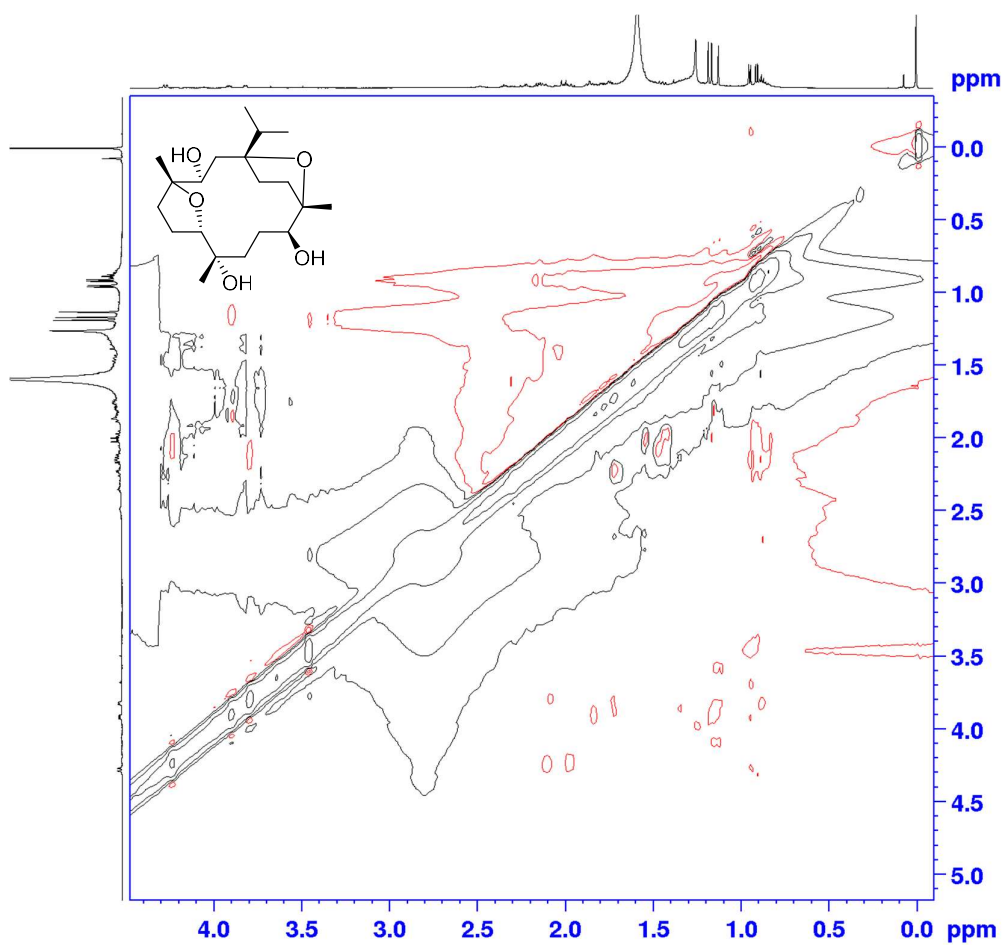

**FigureS46.** NOESY NMR spectrum of compound 5.

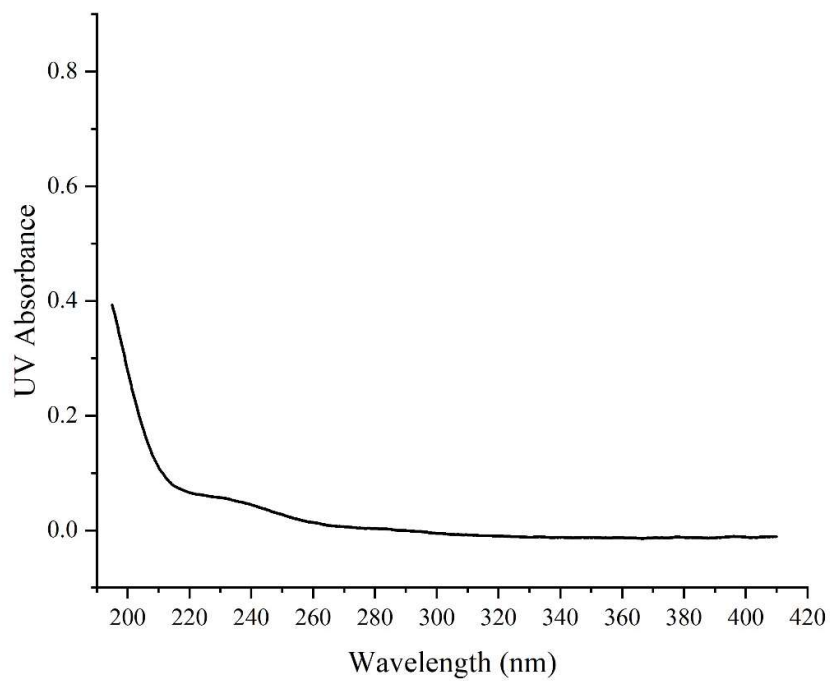

**FigureS47.** UV spectrum of compound 5

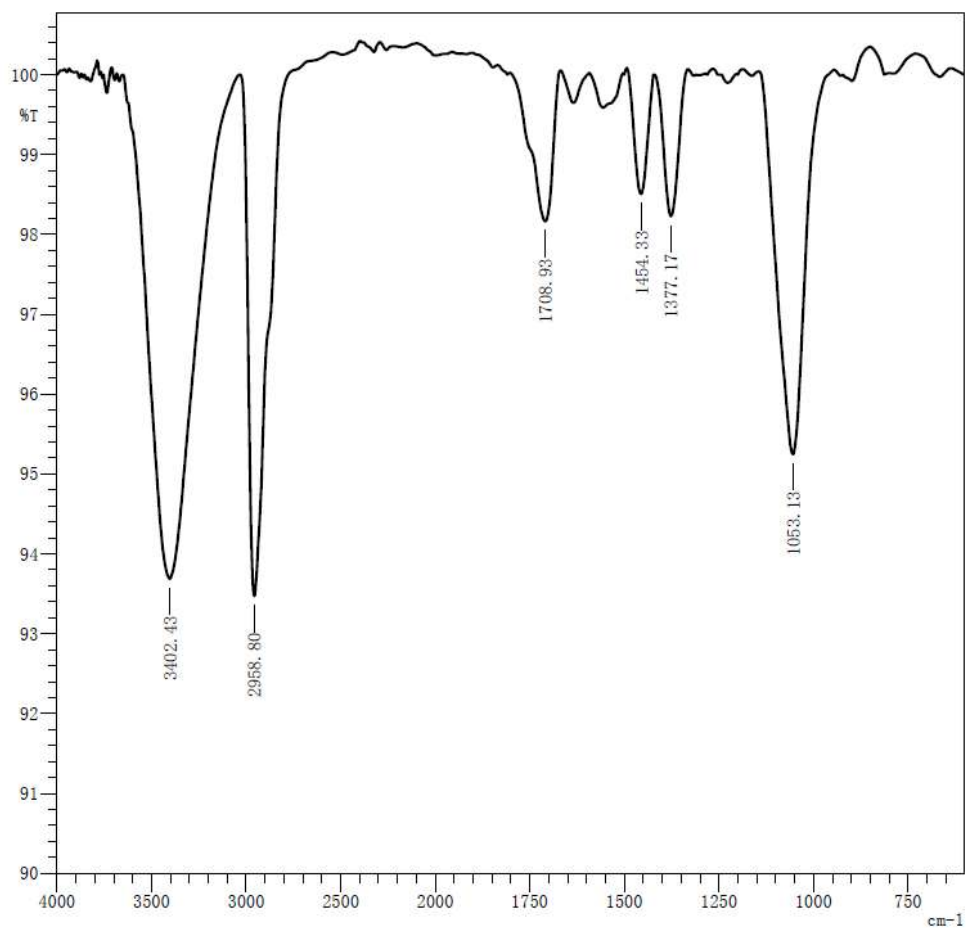

**FigureS48.** IR spectrum of compound **5**.

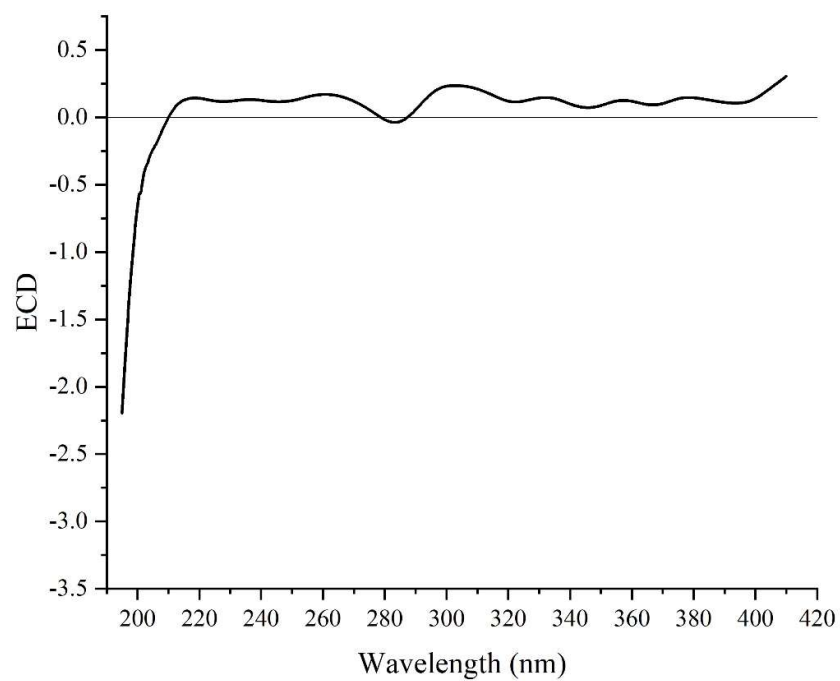

**FigureS49.** ECD spectrum of compound **5**





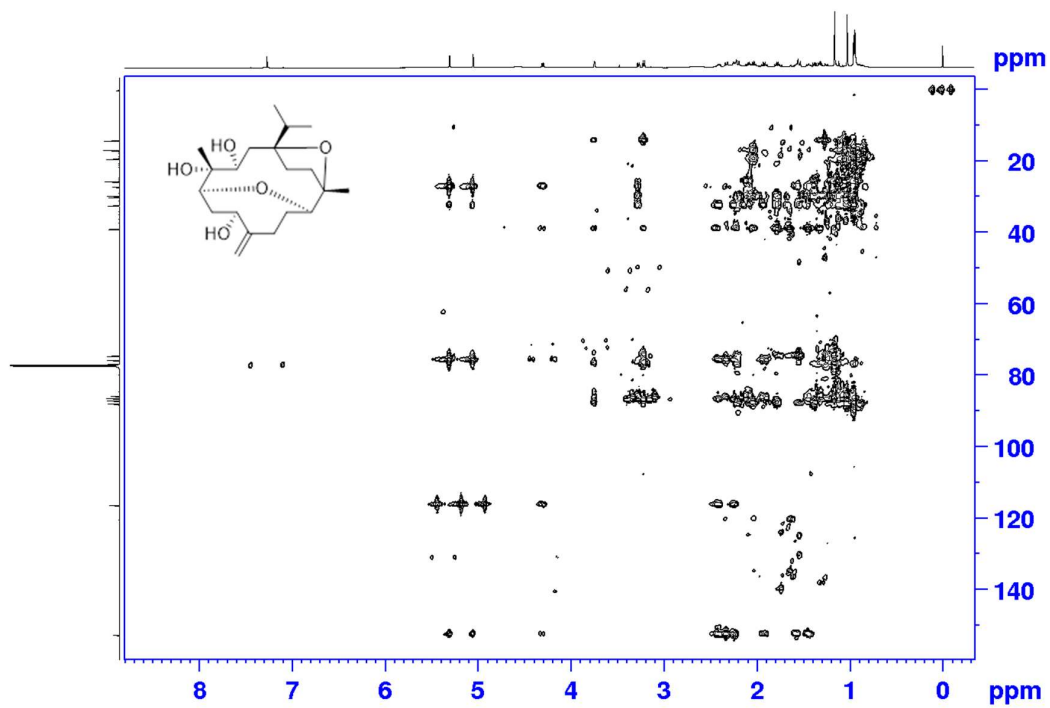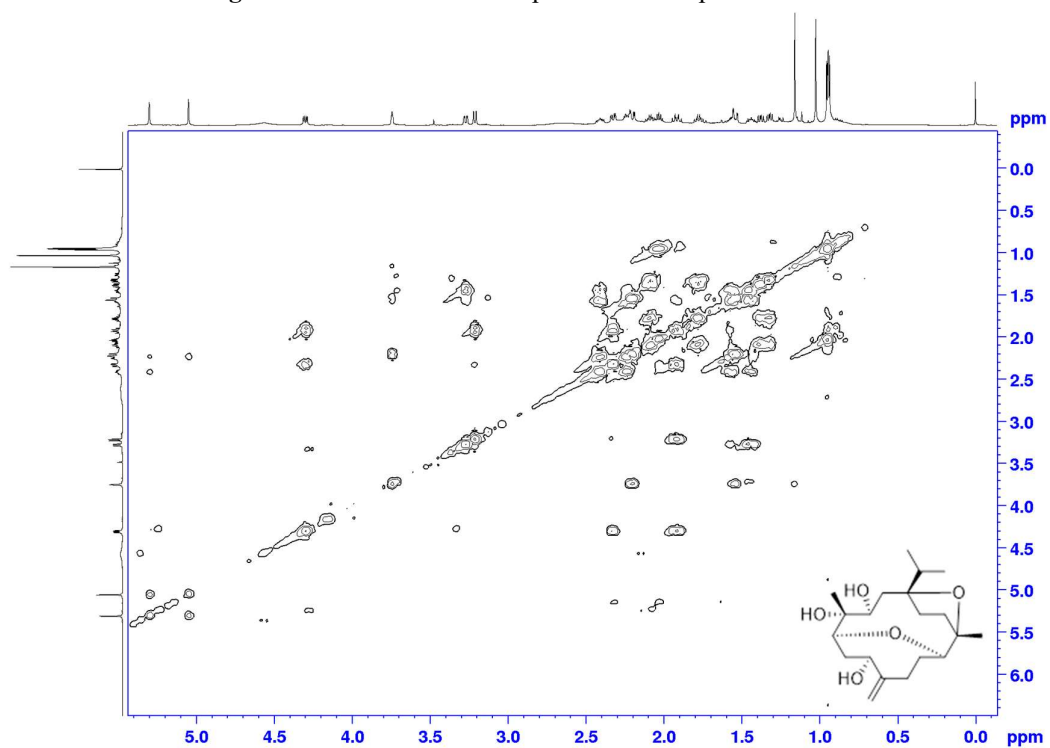



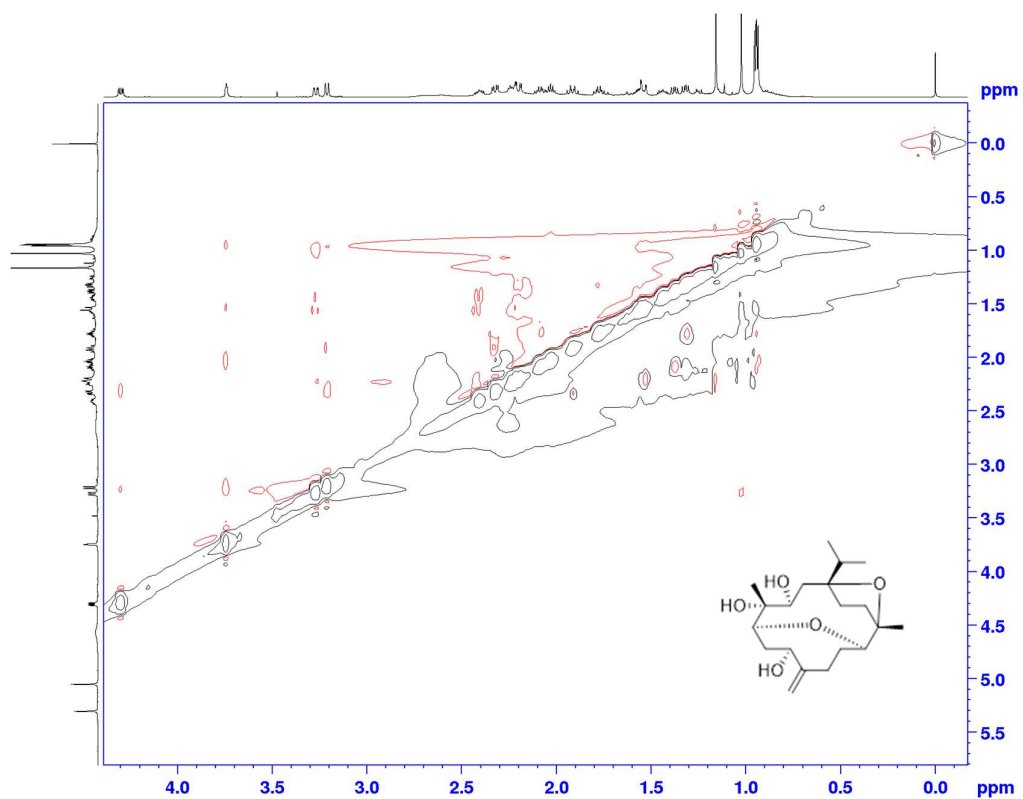

**FigureS56.** NOESY NMR spectrum of compound **6**

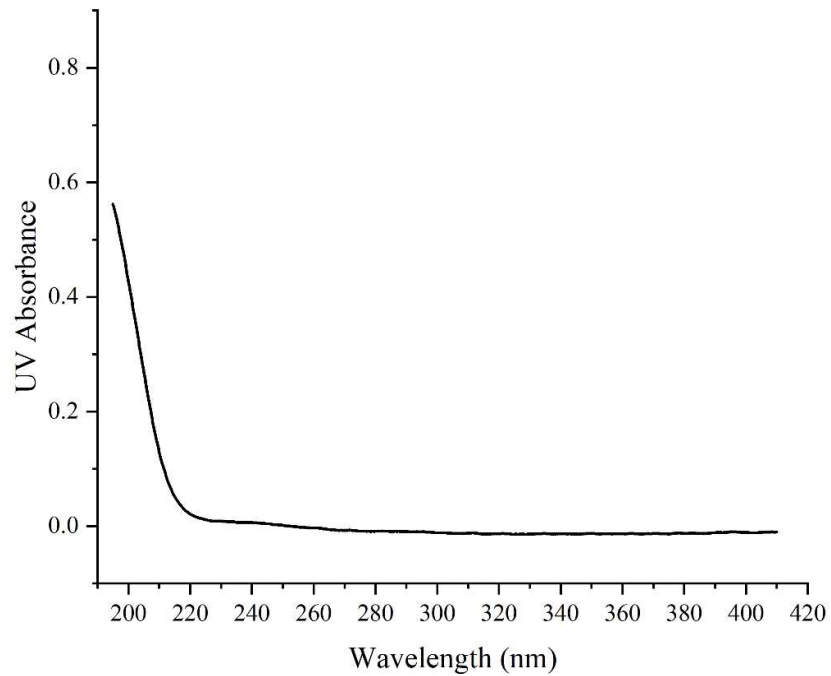

**FigureS57.** UV spectrum of compound **6**

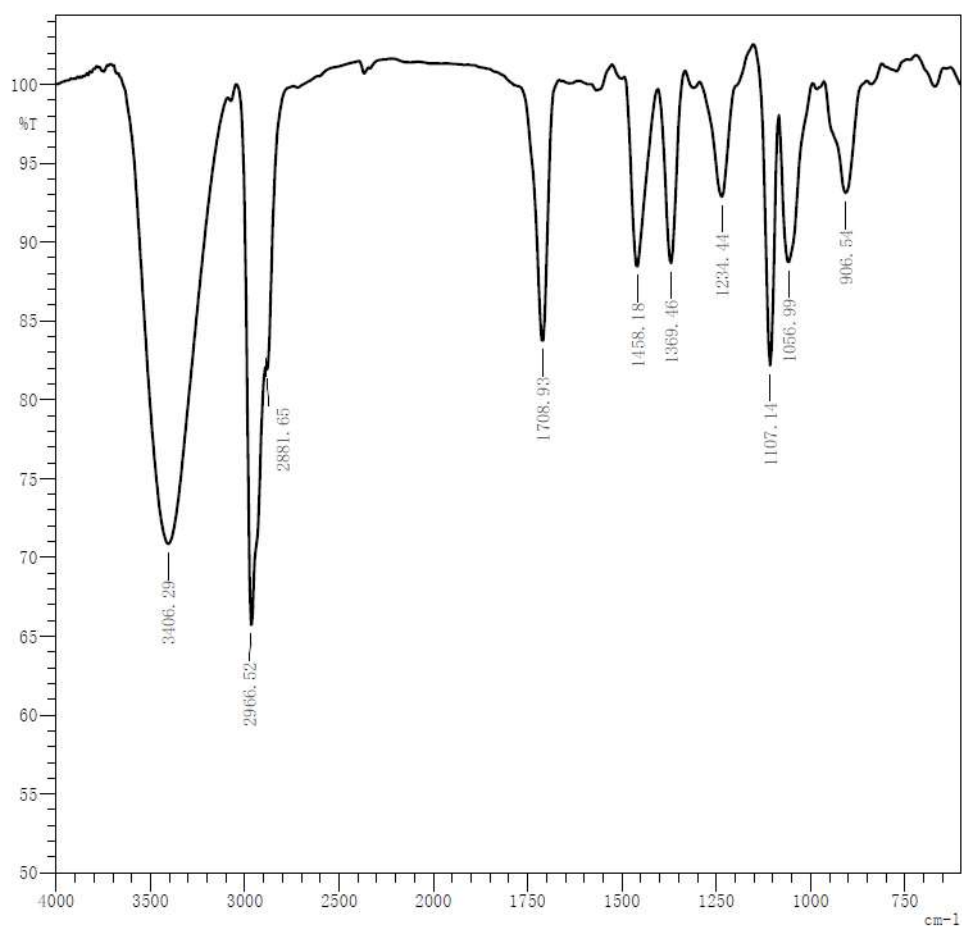

**FigureS58.** IR spectrum of compound 6

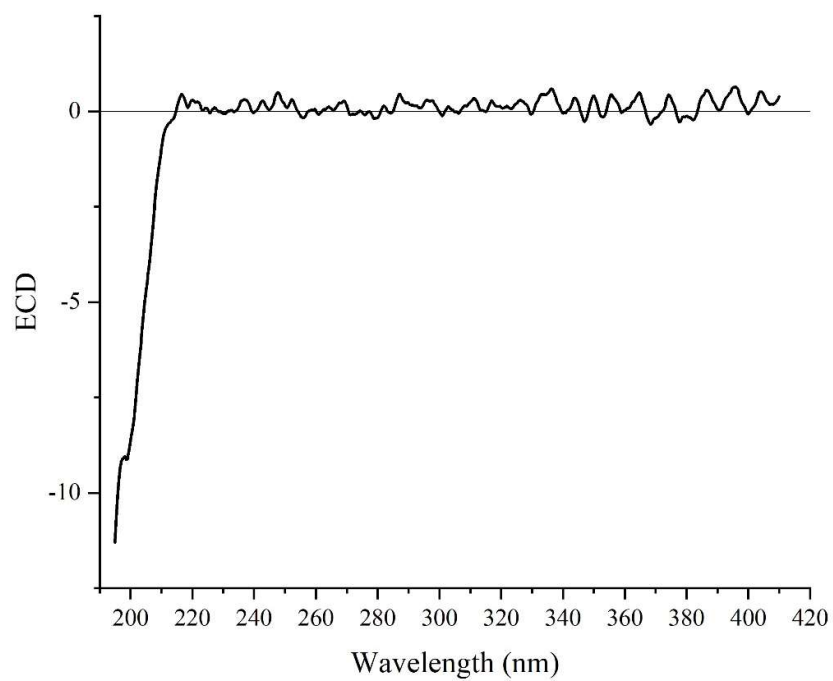

**FigureS59.** ECD spectrum of compound 6.

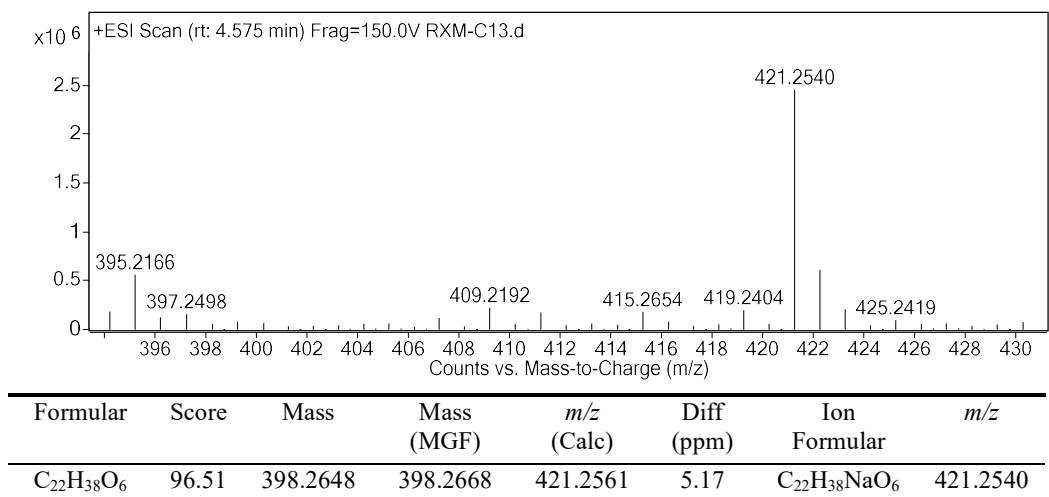

**FigureS60.** HRESIMS spectrum of compound 7.

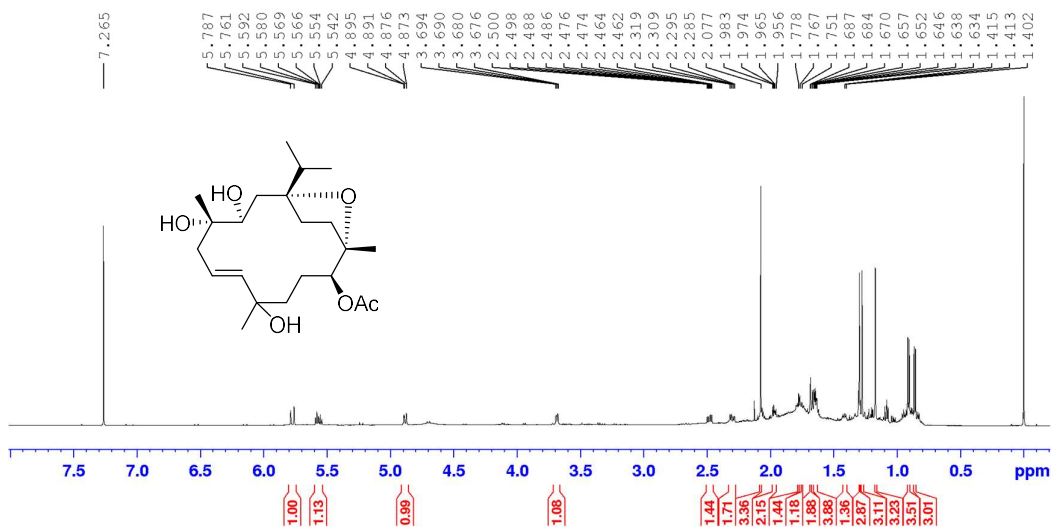

**FigureS61.** <sup>1</sup>H NMR spectrum of compound 7

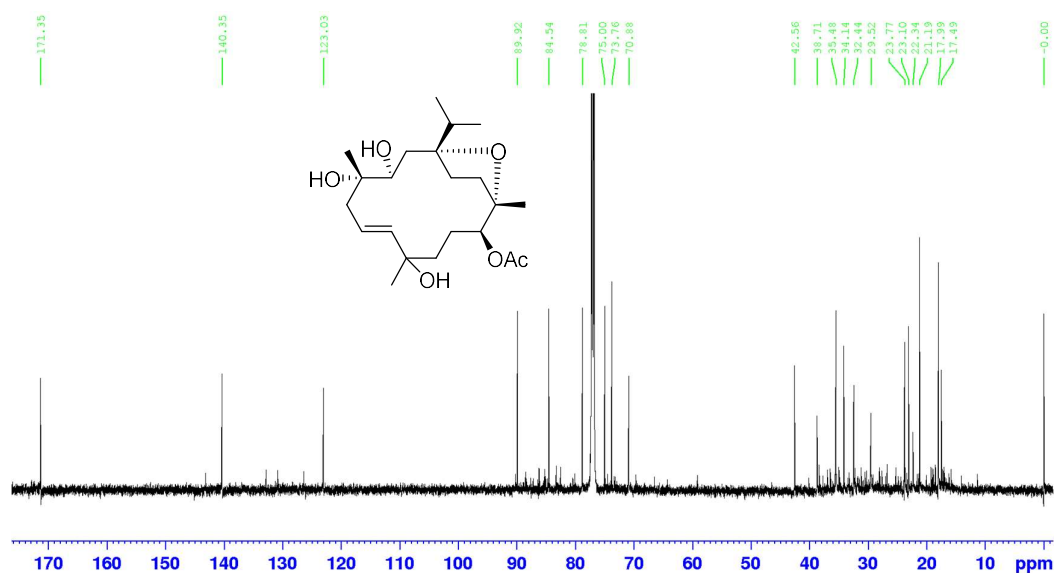

FigureS62.  $^{13}\text{C}$  NMR spectrum of compound 7

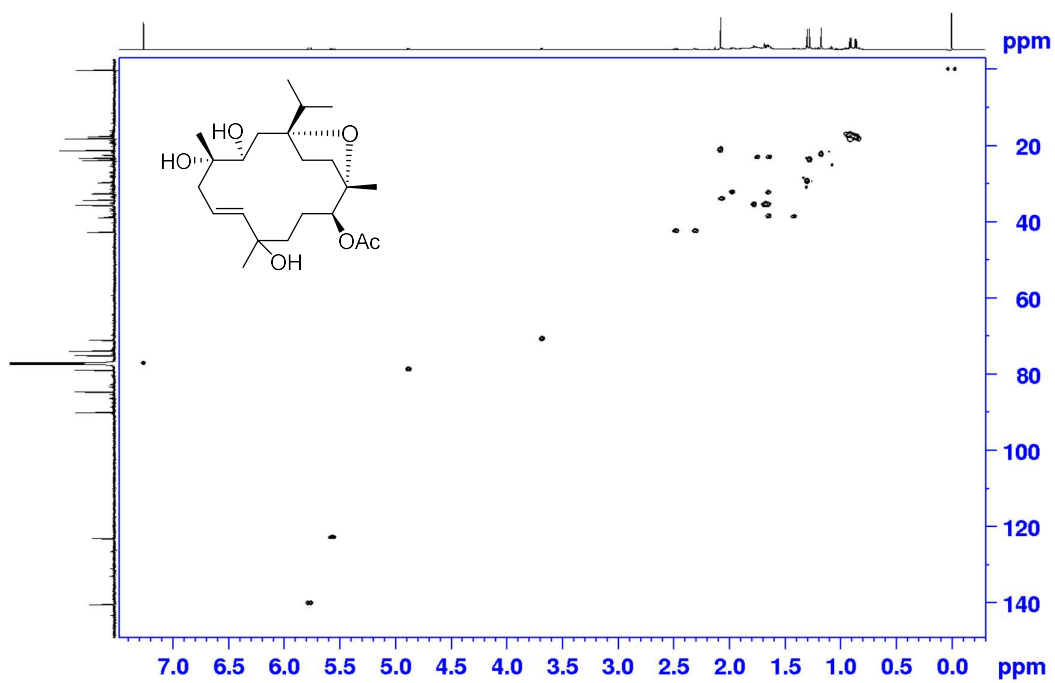

FigureS63. HSQC NMR spectrum of compound 7

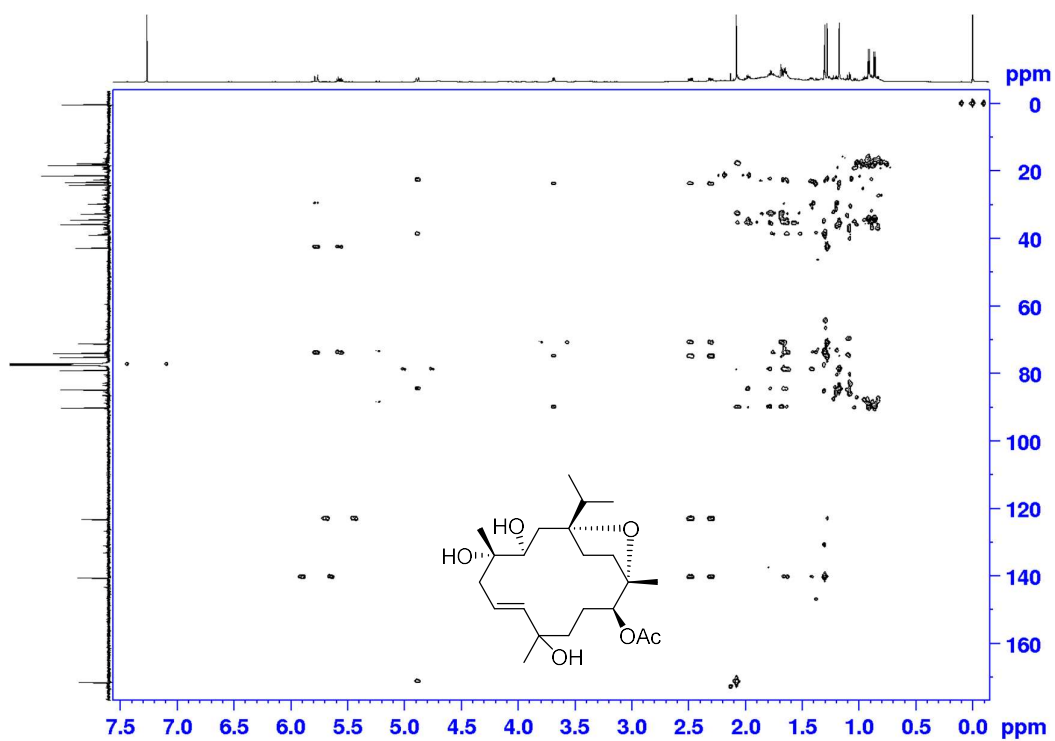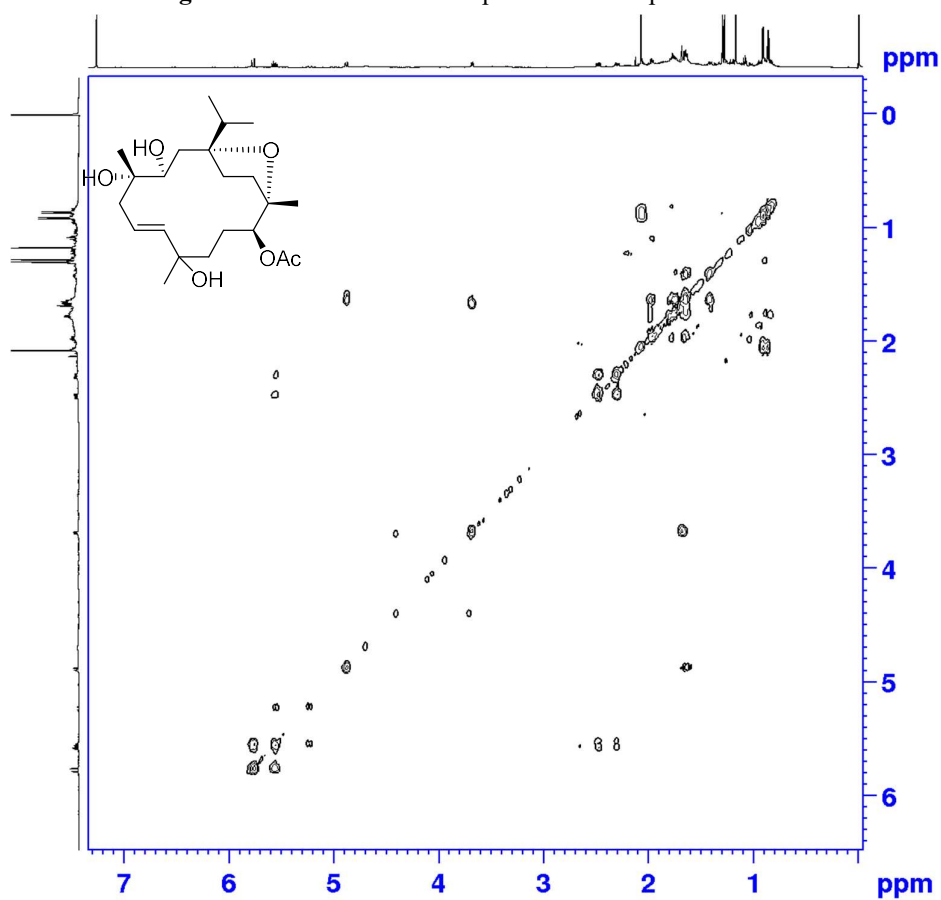

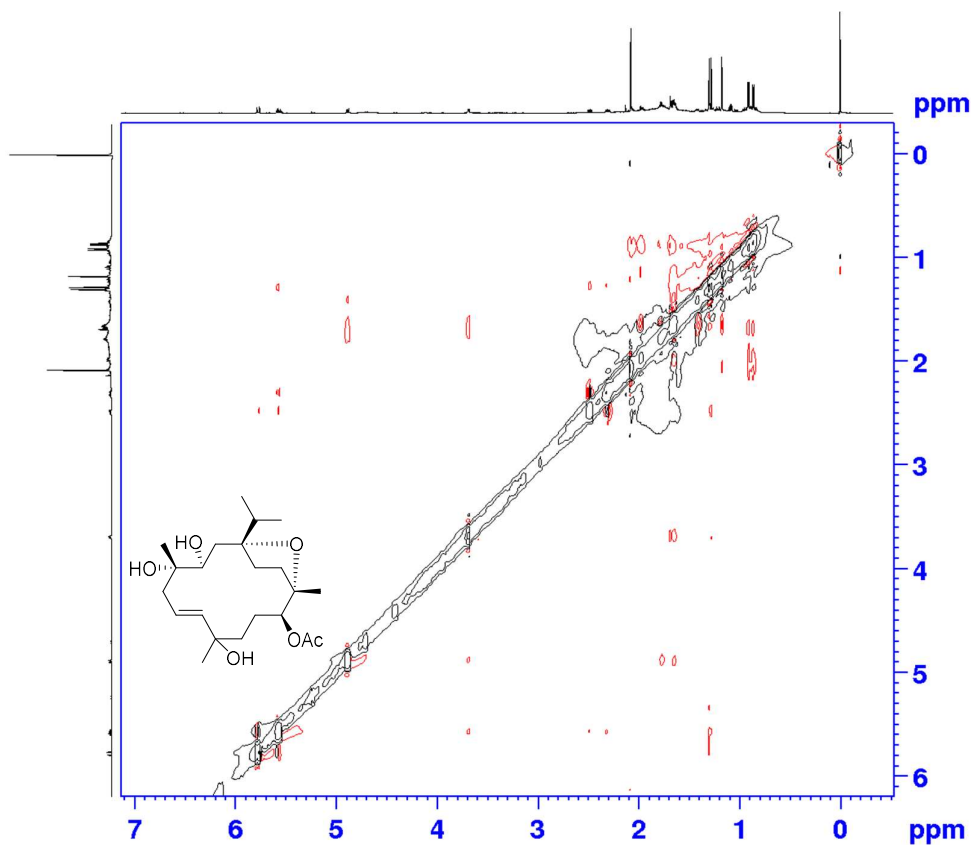

**FigureS66.** NOESY NMR spectrum of compound 7

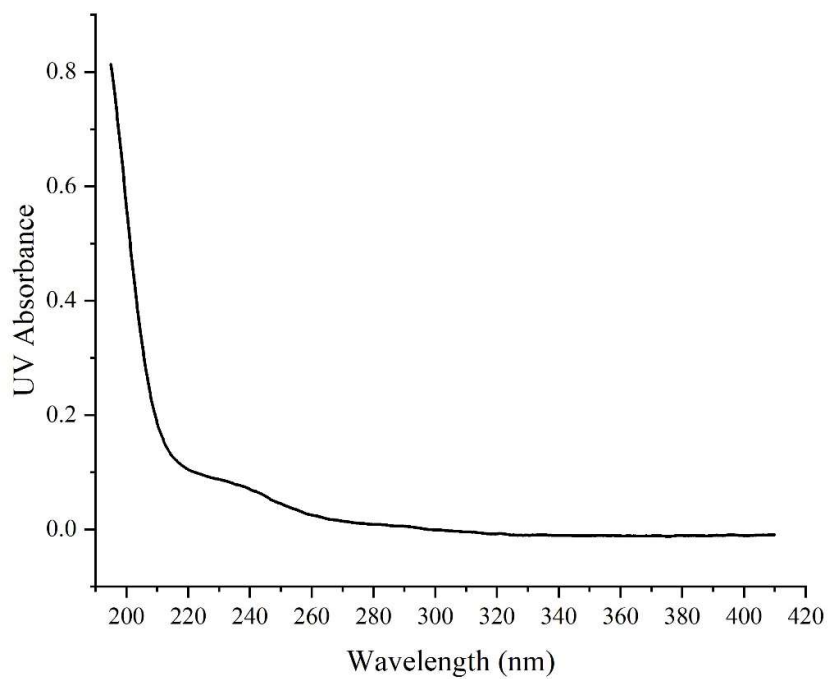

**FigureS67.** UV spectrum of compound 7

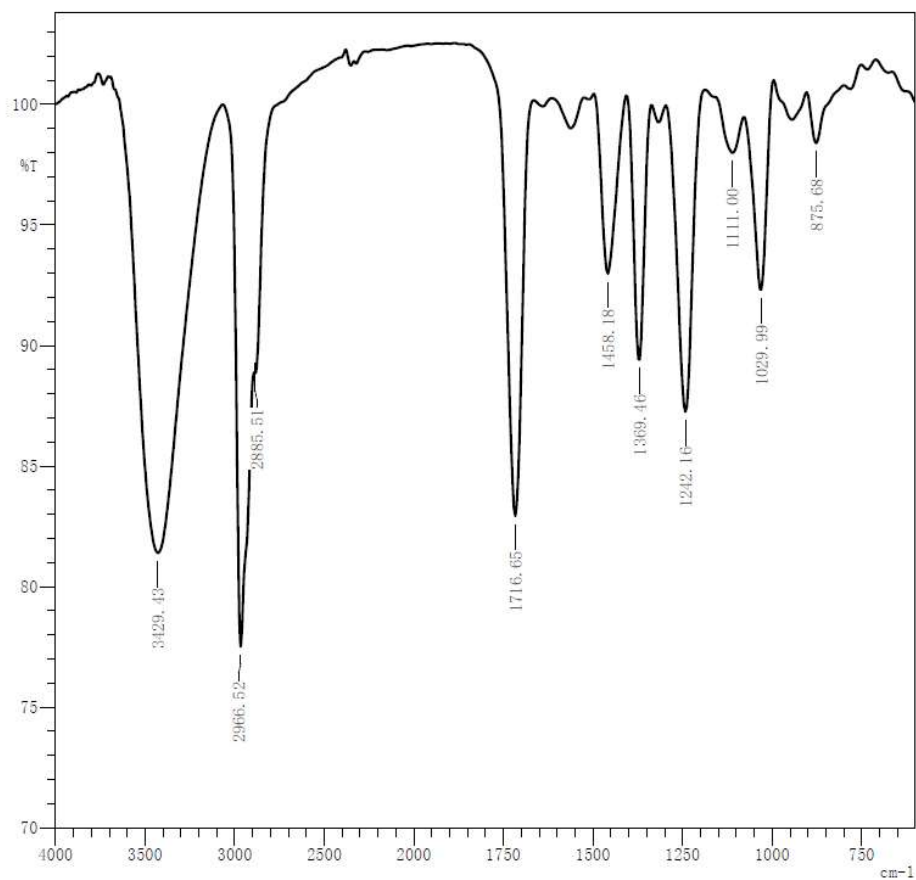

**FigureS68.** IR spectrum of compound 7

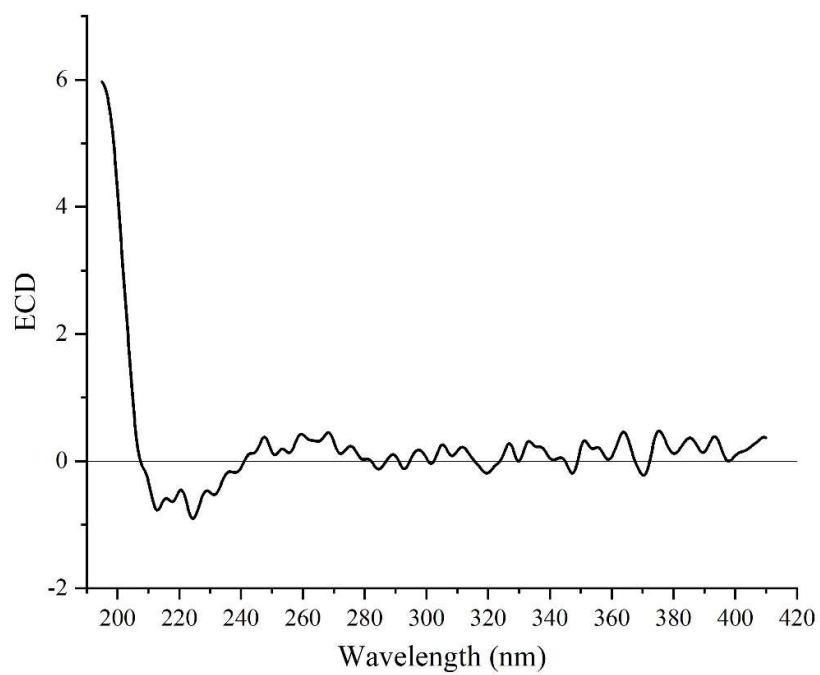

**FigureS69.** ECD spectrum of compound 7

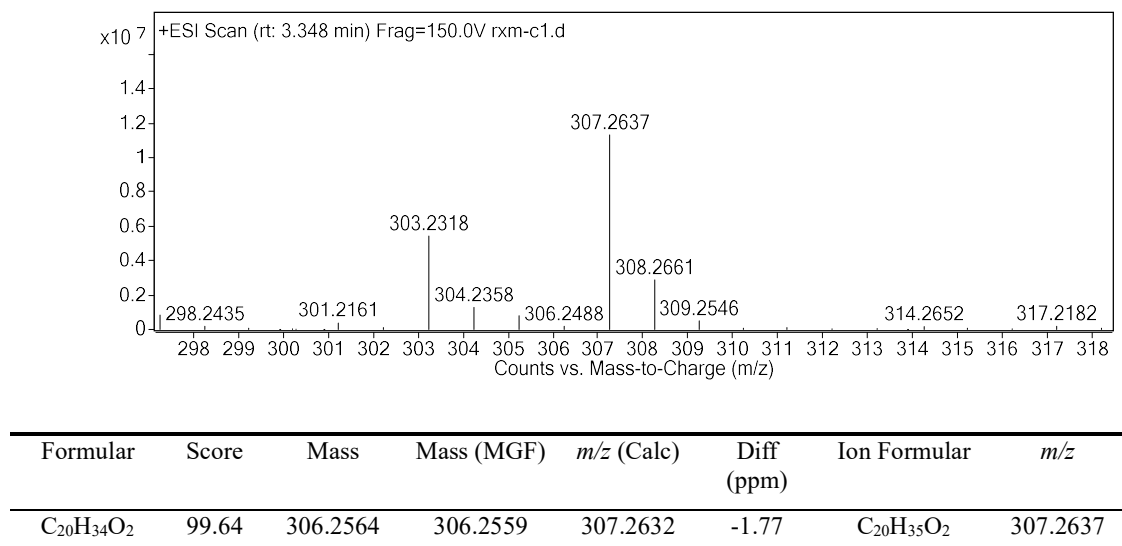

**FigureS70.** HRESIMS spectrum of compound **8**.

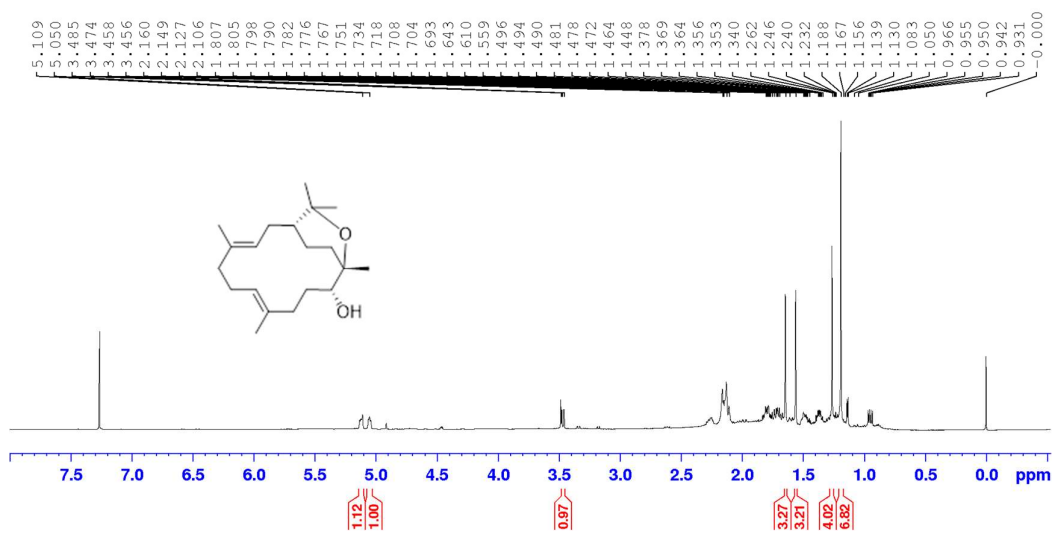

**FigureS71.** <sup>1</sup>H NMR spectrum of compound **8**





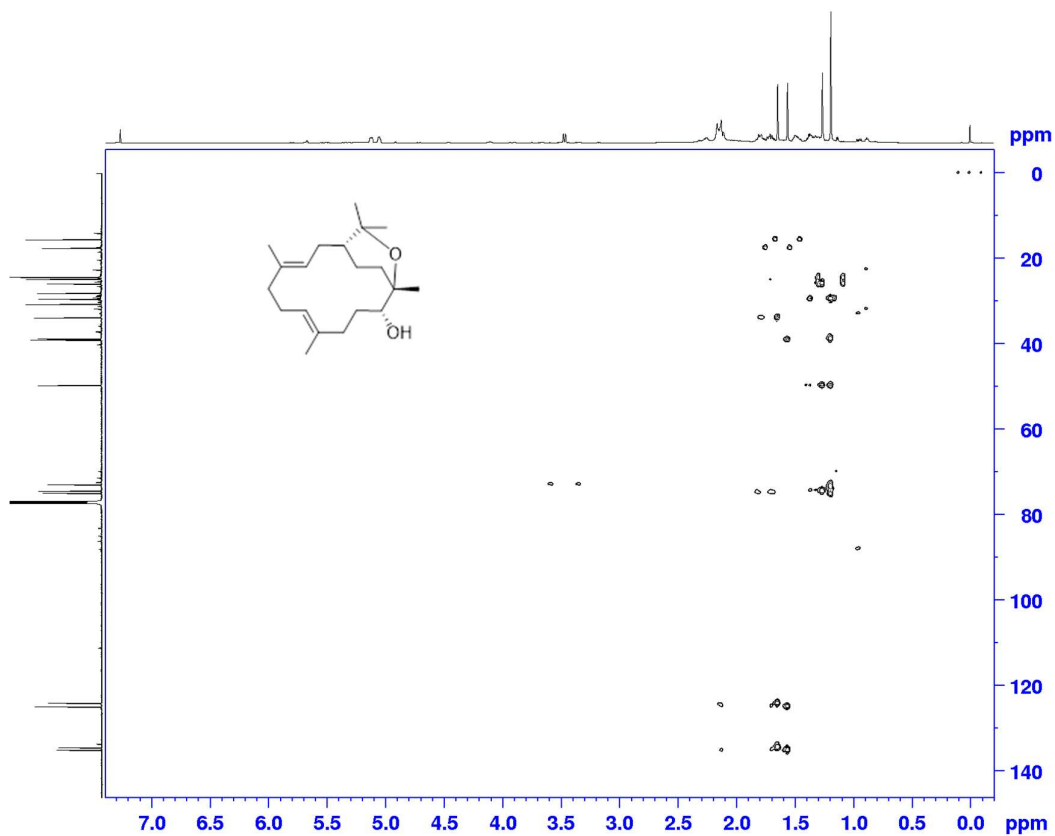

FigureS74. HMBC NMR spectrum of compound **8**

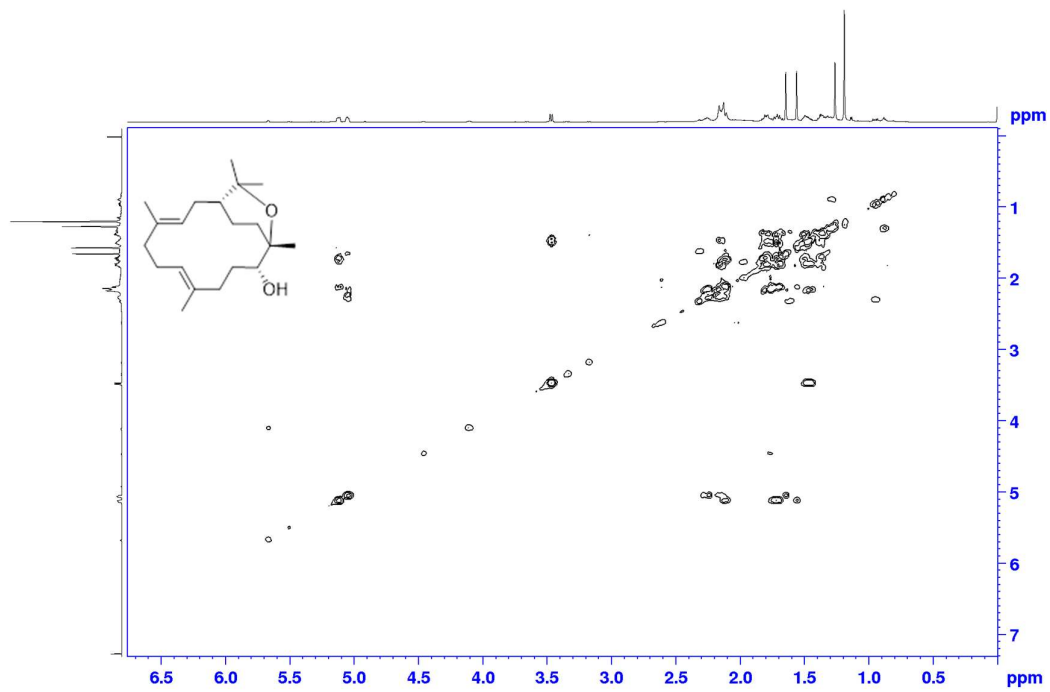

FigureS75.  $^1\text{H}$ - $^1\text{H}$  COSY NMR spectrum of compound **8**

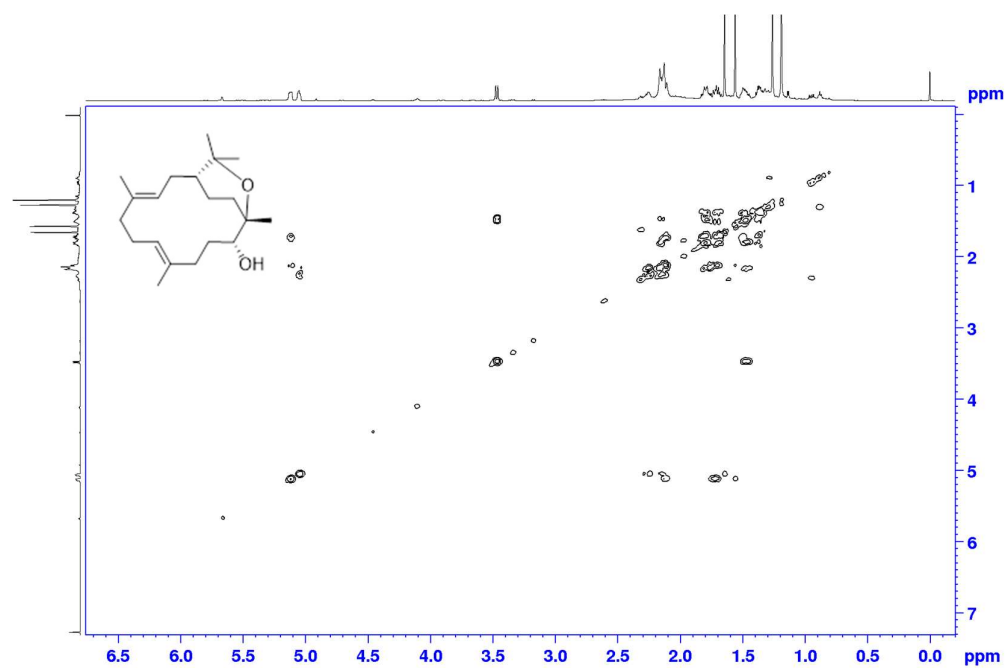

**FigureS76.** NOESY NMR spectrum of compound **8**

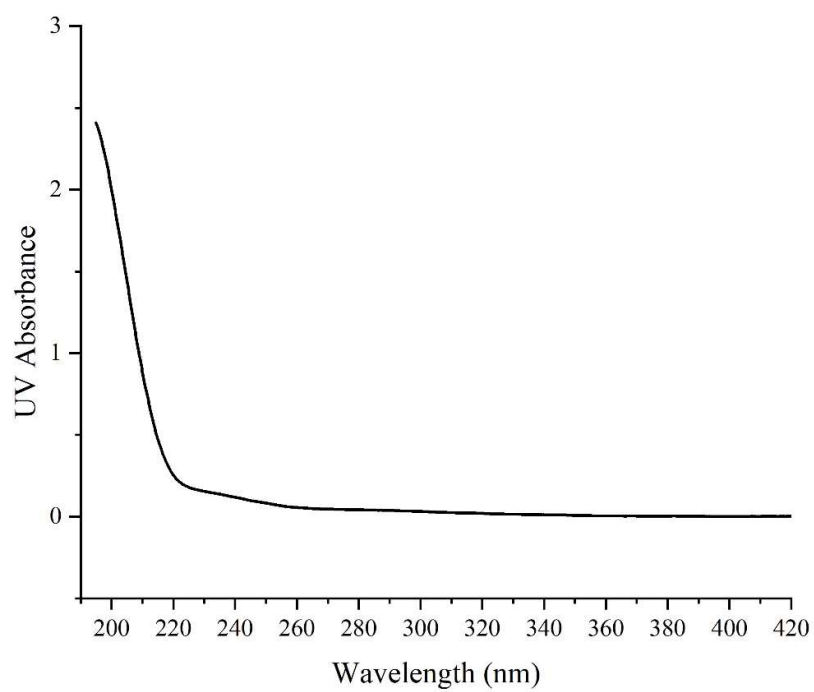

**FigureS77.** UV spectrum of compound **8**

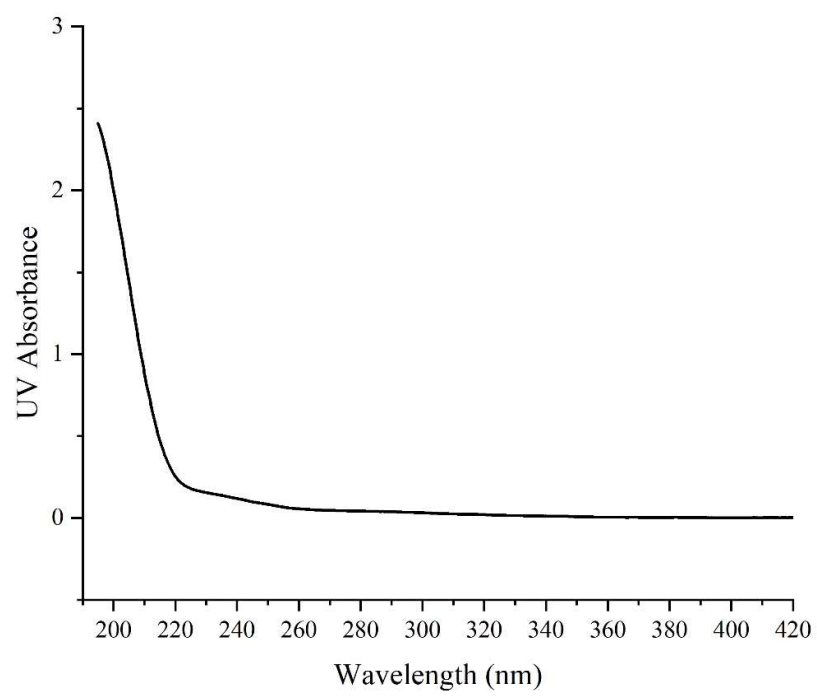

**FigureS78.** ECD spectrum of compound **8**

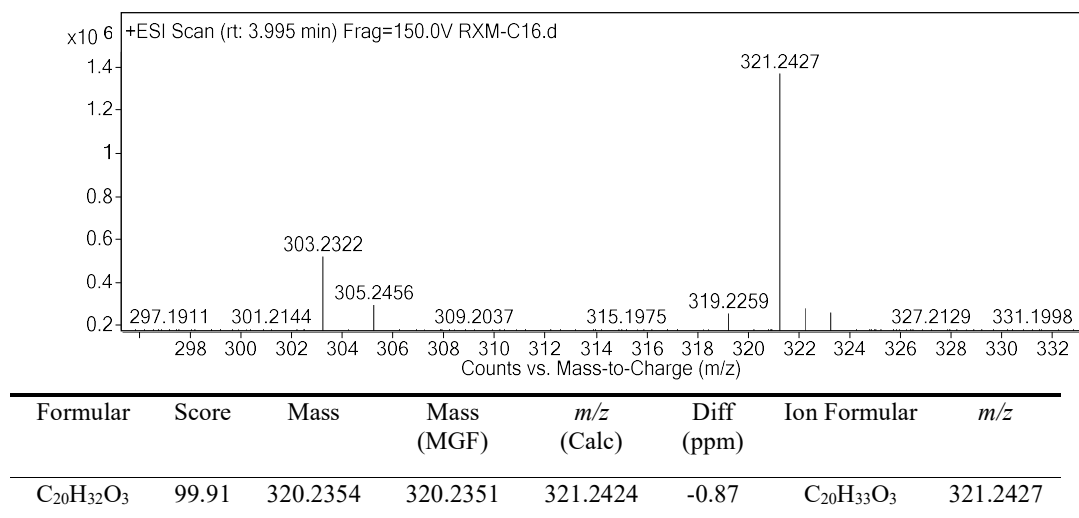

**FigureS79.** HRESIMS spectrum of compound **9**.

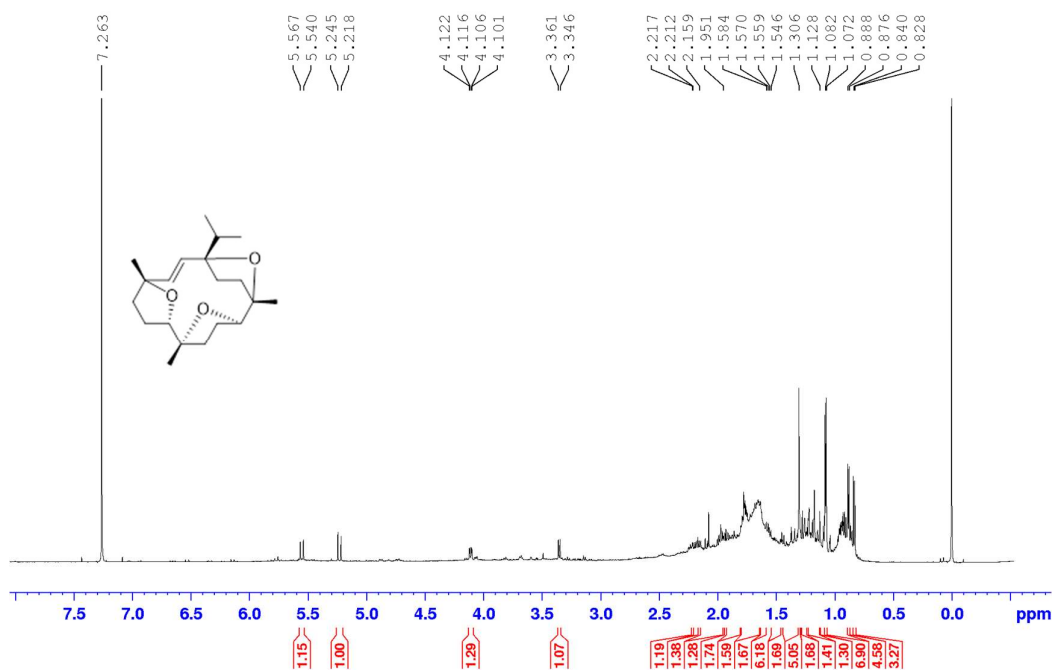

**FigureS80.** <sup>1</sup>H NMR spectrum of compound **9**

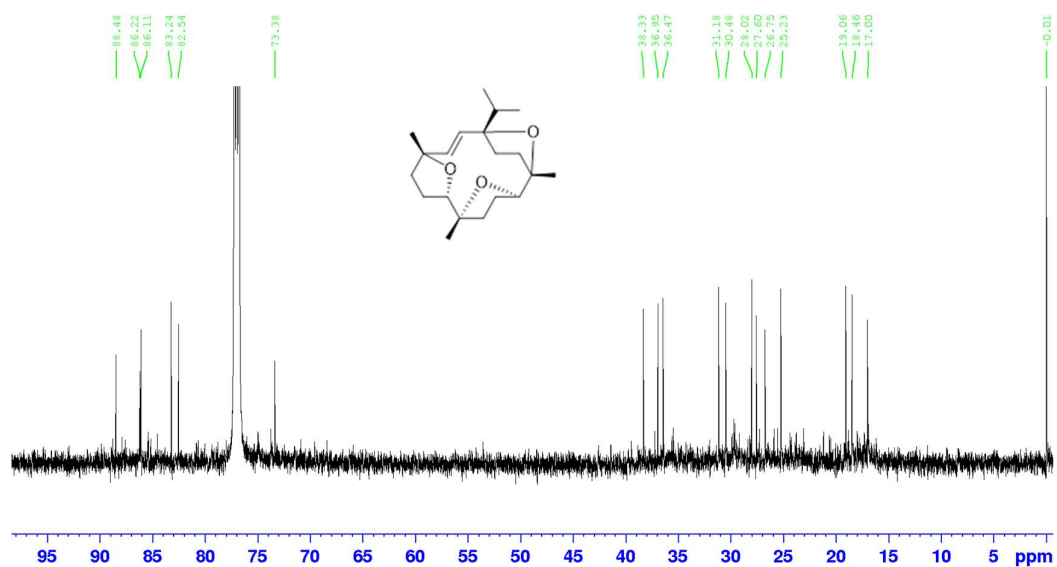

FigureS81. <sup>13</sup>C NMR spectrum of compound 9

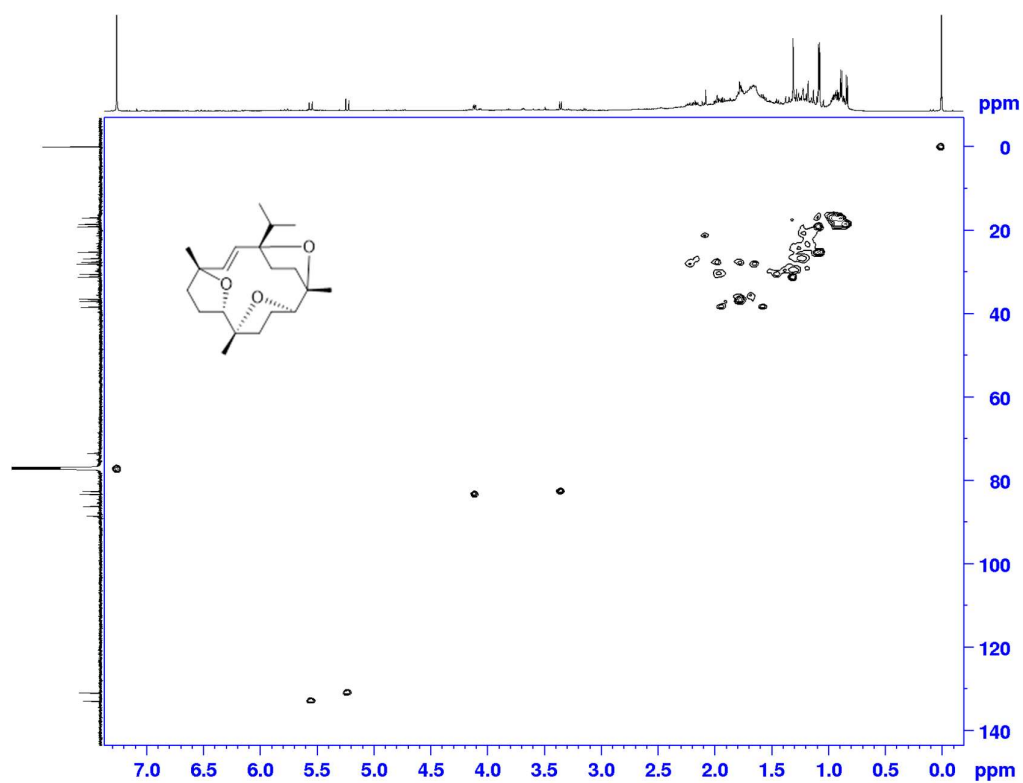

FigureS82. HSQC NMR spectrum of compound 9

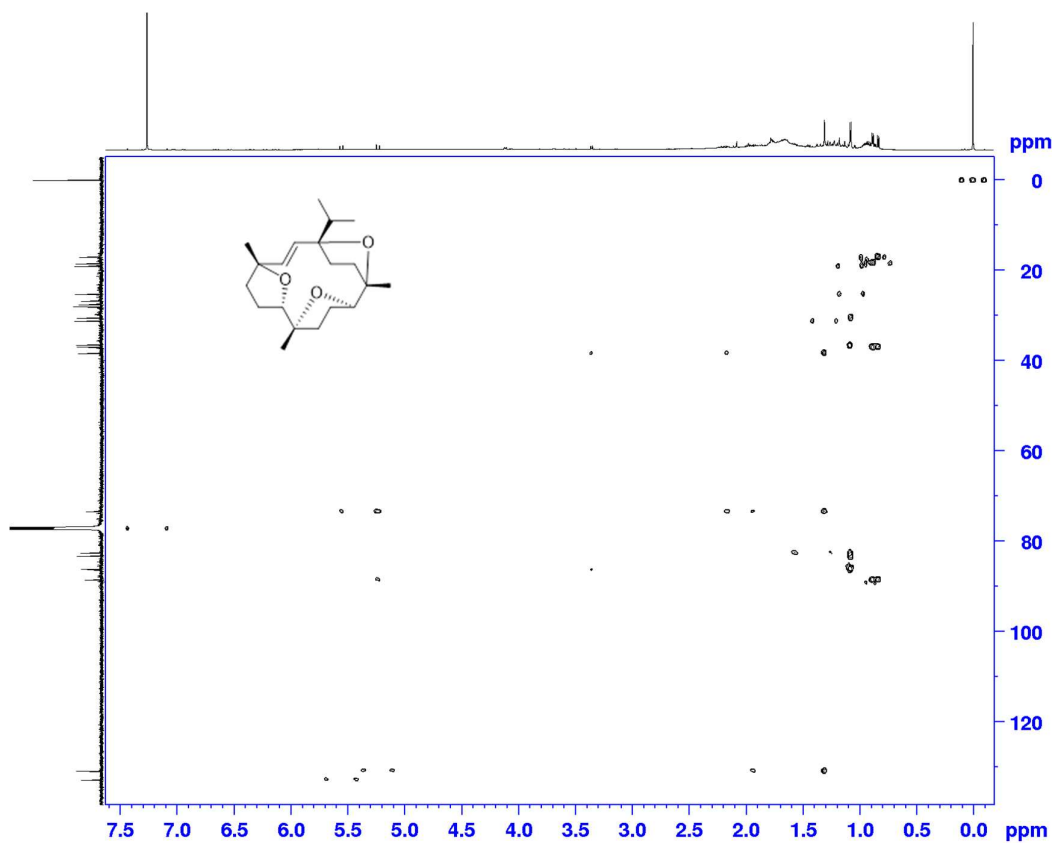

FigureS83. HMBC NMR spectrum of compound 9

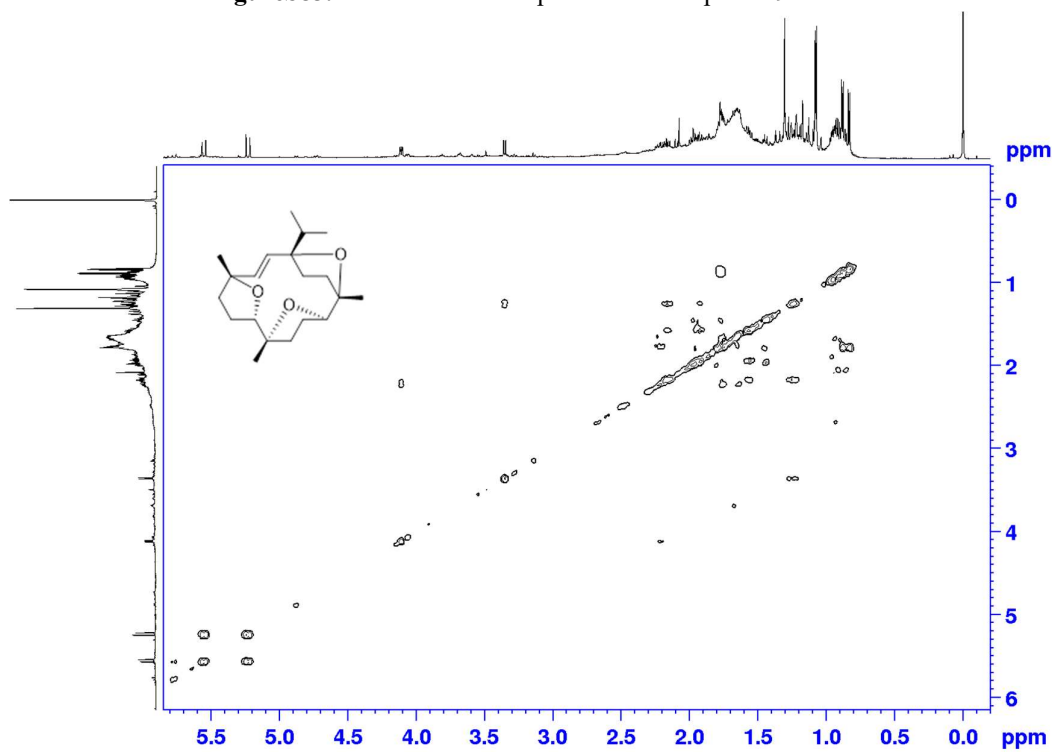

FigureS84.  $^1\text{H}$ - $^1\text{H}$  COSY NMR spectrum of compound 9

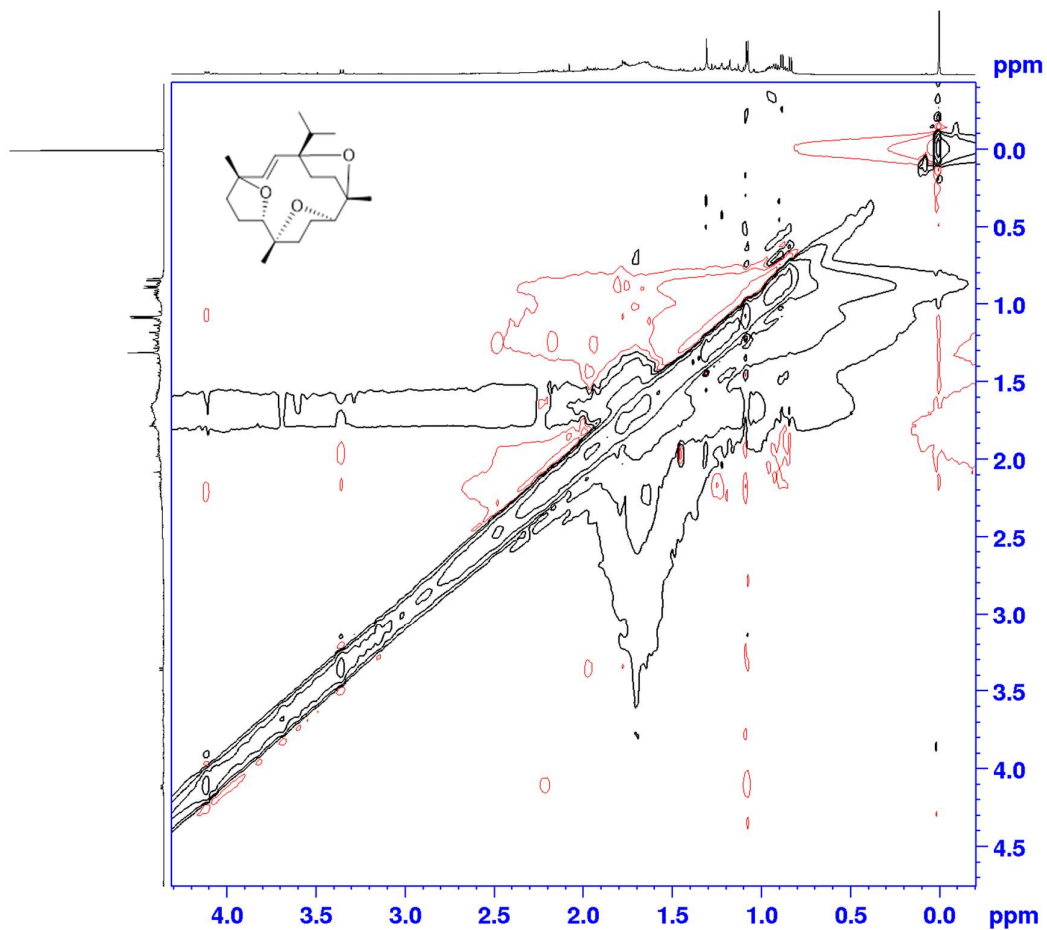

**FigureS85.** NOESY NMR spectrum of compound **9**

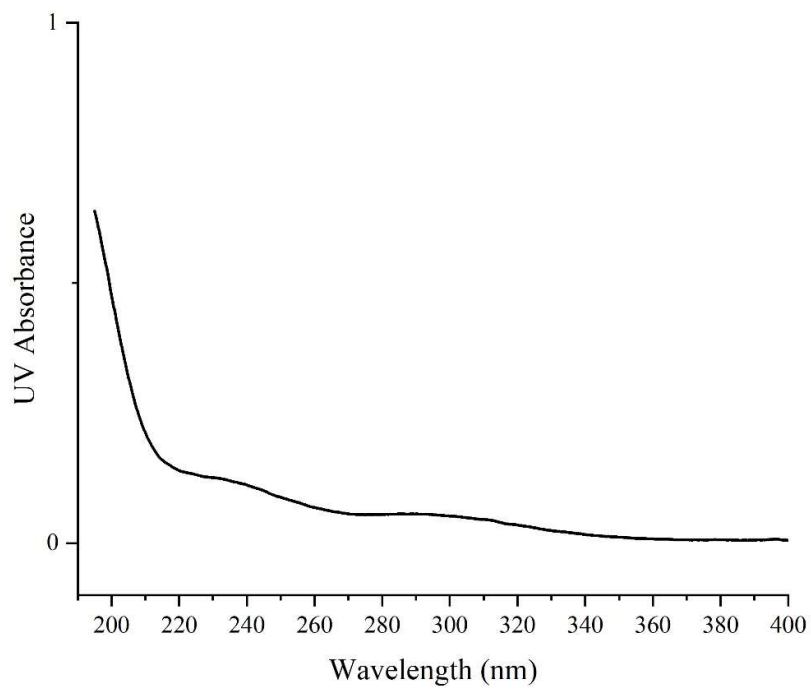

**FigureS86.** UV spectrum of compound **9**



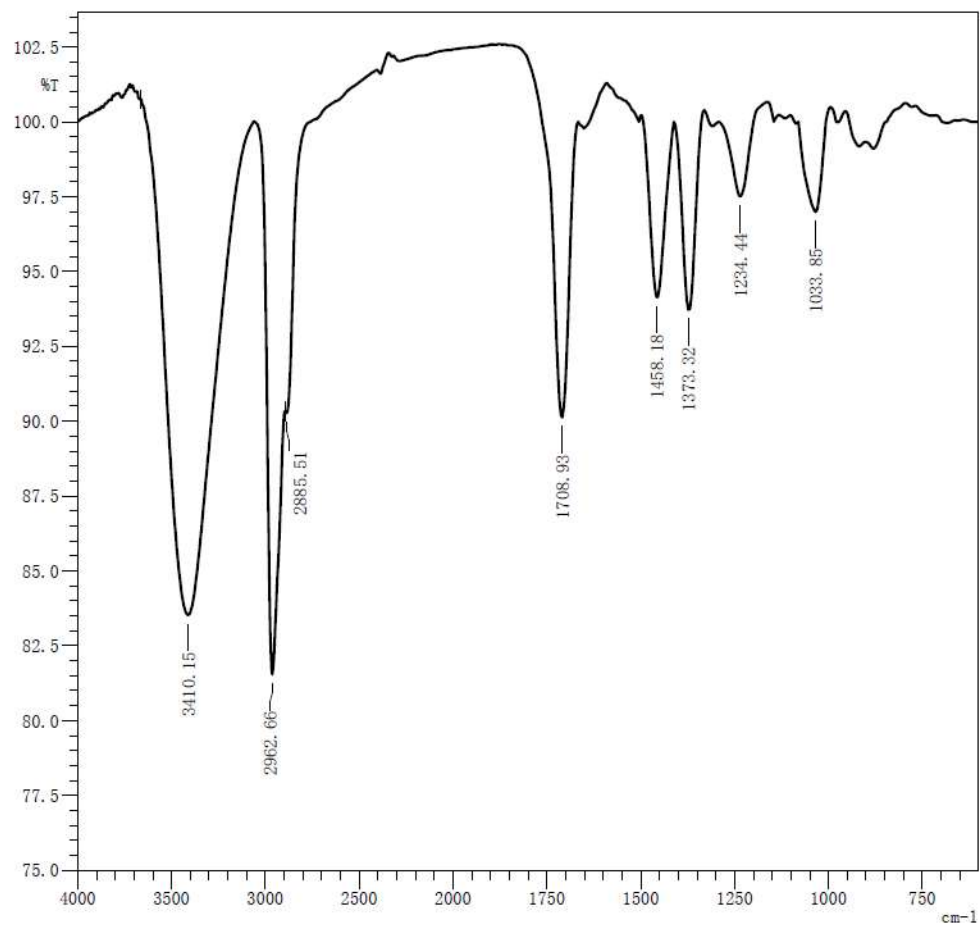

**FigureS87.** IR spectrum of compound **9**

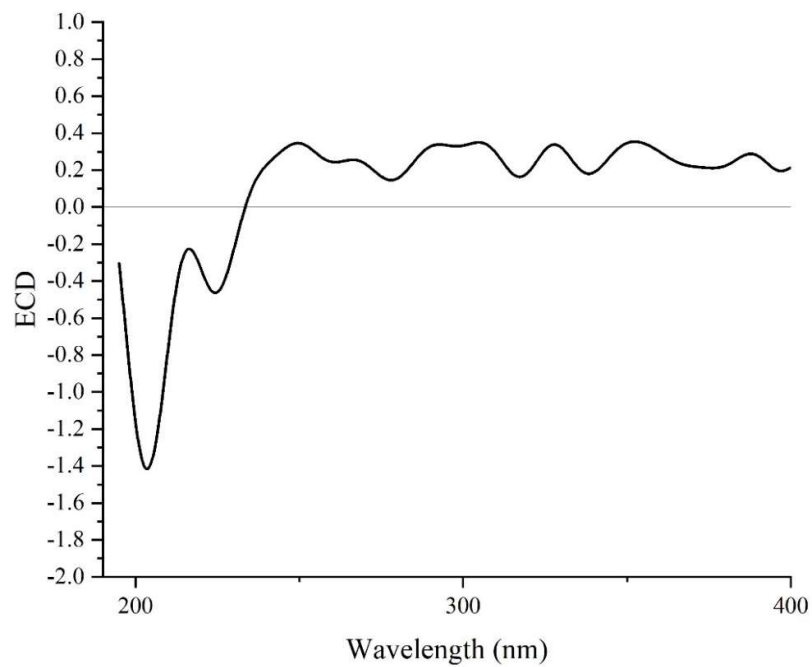

**FigureS88.** ECD spectrum of compound **9**

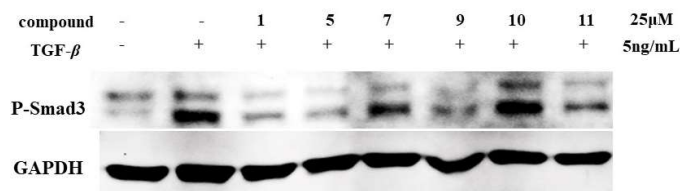

**FigureS89.** Western blot of TGF-β/Smad signal molecules for screening isolated compounds **1**, **5**, **7**, **9**, **10**, and **11** at 25 μM. GAPDH was used as an invariant control for equal loading.

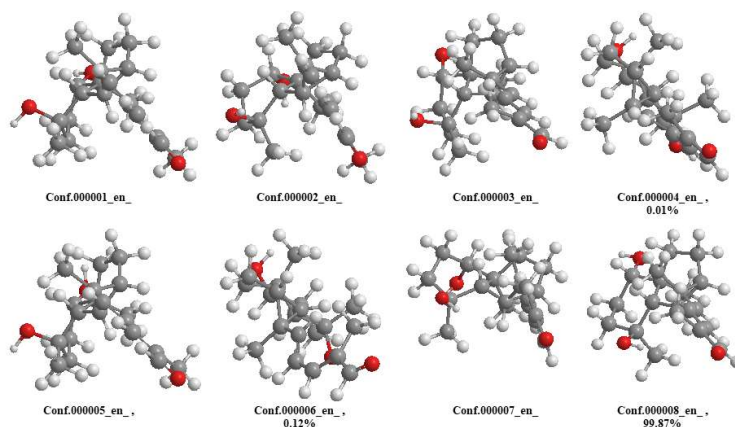

**FigureS90.** DFT computational optimized conformations of (1*R*,4*R*,5*R*,6*S*,7*S*,10*R*,13*R*)-**1**.

**TableS1.** Gibbs free energies<sup>a</sup> and equilibrium populations<sup>b</sup> of low-energy conformers of compound **1**.

| Conformers     | ΔG (a.u.) | P (%) / 100 | G (a.u.)     |
|----------------|-----------|-------------|--------------|
| Conf.000001_en | 0.01365   | 0.0         | -1005.373905 |
| Conf.000002_en | 0.01278   | 0.0         | -1005.374774 |
| Conf.000003_en | 0.01159   | 0.0         | -1005.375966 |
| Conf.000004_en | 0.00892   | 0.01        | -1005.378635 |
| Conf.000005_en | 0.01303   | 0.0         | -1005.374527 |
| Conf.000006_en | 0.00632   | 0.12        | -1005.381236 |
| Conf.000007_en | 0.01335   | 0.0         | -1005.374209 |
| Conf.000008_en | 0.00000   | 99.87       | -1005.387556 |

<sup>a</sup>wB97M-V/def2-TZVP, in a.u.

<sup>b</sup>From ΔG values at 298.15 K.

**TableS2.** Cartesian coordinates for the low-energy reoptimized random research conformers of compound **1** at B3LYP-D3(BJ)/6-31G\* level of theory in methanol.

| Conf.000004 en |               | Standard Orientation (A.U.) |            |           |           |
|----------------|---------------|-----------------------------|------------|-----------|-----------|
| Center number  | Atomic number | Atomic Type                 | X          | Y         | Z         |
| 0              | 6             | 0                           | -6.411856  | 0.643691  | -7.962031 |
| 1              | 6             | 0                           | -5.525125  | -1.754469 | -6.61434  |
| 2              | 6             | 0                           | -4.710425  | -1.280432 | -3.861802 |
| 3              | 6             | 0                           | -6.888961  | 0.100888  | -2.486629 |
| 4              | 6             | 0                           | -7.898505  | 2.546685  | -3.759552 |
| 5              | 6             | 0                           | -8.577284  | 1.933163  | -6.543176 |
| 6              | 6             | 0                           | -6.355031  | 0.490205  | 0.307909  |
| 7              | 6             | 0                           | -7.92659   | 2.352141  | 1.807486  |
| 8              | 6             | 0                           | -9.959718  | 3.892998  | 0.470934  |
| 9              | 6             | 0                           | -10.349893 | 3.250761  | -2.342567 |
| 10             | 6             | 0                           | -8.112397  | -0.470267 | 2.34249   |
| 11             | 6             | 0                           | -2.121746  | 0.017988  | -3.766268 |
| 12             | 8             | 0                           | -4.530285  | -3.642302 | -2.548362 |
| 13             | 8             | 0                           | -9.501172  | 4.066444  | -7.870721 |
| 14             | 6             | 0                           | -6.050938  | 4.793809  | -3.630494 |
| 15             | 1             | 0                           | -8.450024  | -1.265909 | -2.649891 |
| 16             | 1             | 0                           | -6.889531  | 3.417199  | 3.247378  |
| 17             | 1             | 0                           | -4.359361  | 0.431608  | 0.815324  |
| 18             | 6             | 0                           | -10.512234 | -1.919817 | 1.714253  |
| 19             | 6             | 0                           | -4.736581  | -2.719183 | 4.790306  |
| 20             | 6             | 0                           | -6.918348  | -1.394937 | 4.725362  |
| 21             | 6             | 0                           | -3.447658  | -3.74502  | 6.985429  |
| 22             | 6             | 0                           | -3.614927  | -3.074276 | 9.461894  |
| 23             | 6             | 0                           | -5.229333  | -1.01637  | 10.550219 |
| 24             | 1             | 0                           | -10.18096  | 0.60014   | -6.49861  |
| 25             | 6             | 0                           | -1.993241  | -4.492541 | 11.239295 |
| 26             | 8             | 0                           | -1.87027   | -4.110906 | 13.495146 |
| 27             | 1             | 0                           | -4.824511  | 1.982278  | -8.175783 |
| 28             | 1             | 0                           | -7.060699  | 0.201689  | -9.889024 |
| 29             | 1             | 0                           | -3.960591  | -2.647516 | -7.666722 |
| 30             | 1             | 0                           | -7.080753  | -3.139139 | -6.559646 |
| 31             | 1             | 0                           | -11.78264  | 3.74467   | 1.473392  |
| 32             | 1             | 0                           | -9.404272  | 5.893708  | 0.622756  |
| 33             | 1             | 0                           | -11.676206 | 1.656872  | -2.540834 |
| 34             | 1             | 0                           | -11.247056 | 4.855031  | -3.314666 |
| 35             | 1             | 0                           | -2.032283  | 1.719866  | -4.945271 |
| 36             | 1             | 0                           | -1.593196  | 0.542731  | -1.828947 |
| 37             | 1             | 0                           | -0.674389  | -1.300098 | -4.48212  |
| 38             | 1             | 0                           | -3.188275  | -4.613721 | -3.317045 |
| 39             | 1             | 0                           | -8.105458  | 5.212925  | -8.137418 |
| 40             | 1             | 0                           | -4.492665  | 4.638878  | -4.993695 |
| 41             | 1             | 0                           | -7.054635  | 6.573094  | -4.02487  |
| 42             | 1             | 0                           | -5.196473  | 4.968802  | -1.746843 |
| 43             | 1             | 0                           | -10.050118 | -3.885189 | 1.207493  |
| 44             | 1             | 0                           | -11.778774 | -1.966563 | 3.367055  |
| 45             | 1             | 0                           | -11.575701 | -1.082003 | 0.145692  |
| 46             | 1             | 0                           | -3.860911  | -3.1486   | 2.962524  |
| 47             | 1             | 0                           | -7.993461  | -1.058485 | 6.459102  |
| 48             | 1             | 0                           | -2.083687  | -5.246966 | 6.554576  |
| 49             | 1             | 0                           | -5.270897  | 0.654982  | 9.310925  |

|    |   |   |           |           |           |
|----|---|---|-----------|-----------|-----------|
| 50 | 1 | 0 | -7.200834 | -1.647773 | 10.803662 |
| 51 | 1 | 0 | -4.505524 | -0.488663 | 12.423782 |
| 52 | 1 | 0 | -0.825166 | -6.009507 | 10.327543 |

| Conf.000006 en |               | Standard Orientation (A.U.) |            |           |           |
|----------------|---------------|-----------------------------|------------|-----------|-----------|
| Center number  | Atomic number | Atomic Type                 | X          | Y         | Z         |
| 0              | 6             | 0                           | -6.307867  | 1.007363  | -7.979236 |
| 1              | 6             | 0                           | -5.054885  | -1.262709 | -6.708538 |
| 2              | 6             | 0                           | -4.36177   | -0.777332 | -3.93397  |
| 3              | 6             | 0                           | -6.751436  | 0.215602  | -2.549649 |
| 4              | 6             | 0                           | -8.161057  | 2.49197   | -3.757134 |
| 5              | 6             | 0                           | -8.68492   | 1.858509  | -6.570278 |
| 6              | 6             | 0                           | -6.309606  | 0.626353  | 0.263946  |
| 7              | 6             | 0                           | -8.209828  | 2.073268  | 1.789611  |
| 8              | 6             | 0                           | -10.479337 | 3.268742  | 0.478785  |
| 9              | 6             | 0                           | -10.717493 | 2.697725  | -2.363956 |
| 10             | 6             | 0                           | -7.900335  | -0.763628 | 2.26809   |
| 11             | 6             | 0                           | -2.000692  | 0.892483  | -3.74315  |
| 12             | 8             | 0                           | -3.781627  | -3.210435 | -2.912359 |
| 13             | 8             | 0                           | -9.951081  | 3.842799  | -7.845561 |
| 14             | 6             | 0                           | -6.739013  | 5.01825   | -3.52898  |
| 15             | 1             | 0                           | -8.056365  | -1.38938  | -2.76314  |
| 16             | 1             | 0                           | -7.433216  | 3.250445  | 3.30224   |
| 17             | 1             | 0                           | -4.338248  | 0.92358   | 0.806975  |
| 18             | 6             | 0                           | -9.935483  | -2.607597 | 1.479381  |
| 19             | 6             | 0                           | -6.695838  | -3.556795 | 5.949939  |
| 20             | 6             | 0                           | -6.453109  | -1.415551 | 4.565578  |
| 21             | 6             | 0                           | -5.289784  | -4.283958 | 8.186233  |
| 22             | 6             | 0                           | -3.292583  | -3.166178 | 9.36529   |
| 23             | 6             | 0                           | -1.973109  | -0.781128 | 8.589694  |
| 24             | 1             | 0                           | -10.031237 | 0.265224  | -6.591806 |
| 25             | 6             | 0                           | -2.322738  | -4.464619 | 11.637973 |
| 26             | 8             | 0                           | -0.555911  | -3.749355 | 12.910681 |
| 27             | 1             | 0                           | -4.966657  | 2.601933  | -8.11097  |
| 28             | 1             | 0                           | -6.840462  | 0.538094  | -9.935243 |
| 29             | 1             | 0                           | -3.352026  | -1.856092 | -7.747344 |
| 30             | 1             | 0                           | -6.358492  | -2.887062 | -6.735073 |
| 31             | 1             | 0                           | -12.248412 | 2.749644  | 1.451316  |
| 32             | 1             | 0                           | -10.290236 | 5.326672  | 0.727562  |
| 33             | 1             | 0                           | -11.746929 | 0.911116  | -2.659391 |
| 34             | 1             | 0                           | -11.86623  | 4.166488  | -3.283487 |
| 35             | 1             | 0                           | -0.394381  | -0.155775 | -4.543328 |
| 36             | 1             | 0                           | -2.191484  | 2.6799    | -4.776912 |
| 37             | 1             | 0                           | -1.529662  | 1.360048  | -1.771783 |
| 38             | 1             | 0                           | -3.417819  | -3.00793  | -1.133579 |
| 39             | 1             | 0                           | -8.746269  | 5.181539  | -8.144554 |
| 40             | 1             | 0                           | -5.124793  | 5.154628  | -4.827164 |
| 41             | 1             | 0                           | -8.020622  | 6.601723  | -3.950485 |
| 42             | 1             | 0                           | -6.00068   | 5.313714  | -1.610918 |
| 43             | 1             | 0                           | -9.104175  | -4.434211 | 0.924526  |
| 44             | 1             | 0                           | -11.255007 | -2.946218 | 3.051944  |
| 45             | 1             | 0                           | -11.053515 | -1.917937 | -0.119174 |
| 46             | 1             | 0                           | -8.121228  | -4.929274 | 5.355816  |
| 47             | 1             | 0                           | -5.064921  | -0.001276 | 5.134575  |

|    |   |   |           |           |           |
|----|---|---|-----------|-----------|-----------|
| 48 | 1 | 0 | -5.948069 | -6.046737 | 9.05679   |
| 49 | 1 | 0 | -3.228924 | 0.876391  | 8.742401  |
| 50 | 1 | 0 | -0.33734  | -0.471505 | 9.829445  |
| 51 | 1 | 0 | -1.315389 | -0.877617 | 6.614597  |
| 52 | 1 | 0 | -3.371333 | -6.238862 | 12.134952 |

| Conf.000008 en |               | Standard Orientation (A.U.) |            |           |           |
|----------------|---------------|-----------------------------|------------|-----------|-----------|
| Center number  | Atomic number | Atomic Type                 | X          | Y         | Z         |
| 0              | 6             | 0                           | -10.679822 | -0.121417 | -7.163672 |
| 1              | 6             | 0                           | -11.355287 | -1.751796 | -4.878877 |
| 2              | 6             | 0                           | -9.052642  | -2.409205 | -3.241351 |
| 3              | 6             | 0                           | -7.655709  | 0.084631  | -2.573223 |
| 4              | 6             | 0                           | -6.963446  | 1.872678  | -4.802052 |
| 5              | 6             | 0                           | -9.380174  | 2.33457   | -6.367644 |
| 6              | 6             | 0                           | -5.40315   | -0.33539  | -0.828248 |
| 7              | 6             | 0                           | -3.517448  | 1.745702  | -0.448641 |
| 8              | 6             | 0                           | -3.780243  | 4.205015  | -1.921266 |
| 9              | 6             | 0                           | -6.151051  | 4.403685  | -3.593212 |
| 10             | 6             | 0                           | -5.220185  | 0.97833   | 1.762901  |
| 11             | 6             | 0                           | -7.447193  | -4.463447 | -4.505852 |
| 12             | 8             | 0                           | -10.080674 | -3.408003 | -0.950762 |
| 13             | 8             | 0                           | -8.727253  | 3.854347  | -8.473299 |
| 14             | 6             | 0                           | -4.816853  | 0.883703  | -6.496427 |
| 15             | 1             | 0                           | -9.111014  | 1.108825  | -1.49846  |
| 16             | 1             | 0                           | -1.552335  | 1.142943  | -0.222925 |
| 17             | 1             | 0                           | -4.607035  | -2.241766 | -0.866353 |
| 18             | 6             | 0                           | -7.304229  | 2.712179  | 2.668864  |
| 19             | 6             | 0                           | -4.502254  | -0.597275 | 6.228495  |
| 20             | 6             | 0                           | -3.961207  | -0.547086 | 3.729201  |
| 21             | 6             | 0                           | -3.141013  | -2.156034 | 8.003549  |
| 22             | 6             | 0                           | -3.559186  | -2.280134 | 10.53686  |
| 23             | 6             | 0                           | -5.544735  | -0.797345 | 11.927626 |
| 24             | 1             | 0                           | -10.713656 | 3.370438  | -5.120191 |
| 25             | 6             | 0                           | -1.933785  | -3.991191 | 12.014819 |
| 26             | 8             | 0                           | -2.065362  | -4.306033 | 14.28223  |
| 27             | 1             | 0                           | -9.445164  | -1.151222 | -8.48592  |
| 28             | 1             | 0                           | -12.413009 | 0.343156  | -8.228297 |
| 29             | 1             | 0                           | -12.305846 | -3.507941 | -5.46409  |
| 30             | 1             | 0                           | -12.697573 | -0.731946 | -3.654932 |
| 31             | 1             | 0                           | -3.682604  | 5.844416  | -0.637141 |
| 32             | 1             | 0                           | -2.098928  | 4.34828   | -3.139596 |
| 33             | 1             | 0                           | -7.760835  | 5.126756  | -2.48576  |
| 34             | 1             | 0                           | -5.824398  | 5.795808  | -5.101412 |
| 35             | 1             | 0                           | -5.73682   | -4.904363 | -3.407005 |
| 36             | 1             | 0                           | -8.584408  | -6.199469 | -4.621457 |
| 37             | 1             | 0                           | -6.838547  | -3.951538 | -6.42032  |
| 38             | 1             | 0                           | -8.6947    | -3.763238 | 0.184926  |
| 39             | 1             | 0                           | -10.238302 | 4.163321  | -9.447036 |
| 40             | 1             | 0                           | -3.233013  | 0.155591  | -5.367729 |
| 41             | 1             | 0                           | -5.435578  | -0.638055 | -7.761082 |
| 42             | 1             | 0                           | -4.11139   | 2.416875  | -7.70504  |
| 43             | 1             | 0                           | -8.036534  | 3.922738  | 1.159759  |
| 44             | 1             | 0                           | -8.901192  | 1.612736  | 3.42836   |
| 45             | 1             | 0                           | -6.603714  | 3.964059  | 4.176045  |

|    |   |   |           |           |           |
|----|---|---|-----------|-----------|-----------|
| 46 | 1 | 0 | -6.019962 | 0.587592  | 6.972845  |
| 47 | 1 | 0 | -2.42314  | -1.765502 | 3.055406  |
| 48 | 1 | 0 | -1.624621 | -3.337191 | 7.223852  |
| 49 | 1 | 0 | -5.259853 | 1.255239  | 11.713603 |
| 50 | 1 | 0 | -7.458531 | -1.234199 | 11.230466 |
| 51 | 1 | 0 | -5.460392 | -1.263529 | 13.948515 |
| 52 | 1 | 0 | -0.495755 | -5.0355   | 10.856843 |
